# Supplementary material
Source: PubMed Central journal article supplement (PMC7212085)
Supplement: EMS86231-supplement-appendix.pdf [file EMS86231-supplement-appendix.pdf]

# Zoonotic causes of febrile illness in malaria endemic countries: a systematic review

## Supplementary Information

### Zoonoses Search Concept Construction

To construct a list of frequently reported zoonotic causes of human fever, we conducted preliminary searches of Medline and Embase using the search syntax '(exp Fever/ OR fever.mp.) AND (exp Zoonoses/ OR zoonoses.mp OR zoonosis.mp)' limited to humans.

The outputs of these searches were combined and de-duplicated in R.<sup>1</sup> The complete list of all subject headings associated with these articles was extracted and each heading was classified by two independent reviewers to identify headings for named disease causing agents or named diseases. Headings that referred to non-specific pathogen groups e.g., 'arboviruses' and those that referred to non-specific clinical symptoms, signs, syndromes, or diseases e.g., 'jaundice' and 'parasitic diseases' were excluded. All headings classified as either a pathogen or disease by one or both reviewers (JEBH and PH) were matched to a list of 1,415 infectious organisms known to be pathogenic to humans<sup>2</sup>. Non-zoonotic pathogens or diseases based on the classification by Taylor et al.<sup>2</sup> were excluded. The frequency of appearance of each zoonosis-related heading in the initial search output dataset was tabulated. Pathogen/disease subject headings that appeared in >10 references identified through the initial 'Fever and Zoonoses' searches were retained.

For the 'zoonoses' concept, the list of zoonotic pathogens identified above was combined with lists of zoonotic diseases from the World Health Organization (WHO)<sup>3</sup> and World Organisation of Animal Health (OIE)<sup>4</sup>.

All identified pathogens or diseases were then classified to differentiate pathogens that are normatively acquired by people through direct or indirect transmission from vertebrate animals to humans, as compared to pathogens where zoonotic transmission has been recorded but where sustained transmission within human populations also occurs and the majority of human infections are not acquired through zoonotic transmission. This classification was made following the definitions used in Wolfe et al.<sup>5</sup> Three reviewers (JAC, SC, and MPR) independently classified listed pathogens or diseases using the stages in the transformation of an animal pathogen into a specialized pathogen of humans described in Wolfe et al.<sup>5</sup>

- Stage 1. A microbe that is present in animals but that has not been detected in humans under natural conditions (that is, excluding modern technologies that can inadvertently transfer microbes, such as blood transfusion, organ transplants, or hypodermic needles).
- Stage 2. A pathogen of animals that, under natural conditions, has been transmitted from animals to humans ('primary infection') but has not been transmitted between humans ('secondary infection').
- Stage 3. Animal pathogens that can undergo only a few cycles of secondary transmission between humans, so that occasional human outbreaks triggered by a primary infection soon die out.
- Stage 4. A disease that exists in animals, and that has a natural (sylvatic) cycle of infecting humans by primary transmission from the animal host, but that also undergoes long sequences of secondary transmission between humans without the involvement of animal hosts.
- Stage 5. A pathogen exclusive to humans.<sup>5</sup>

Tie-breaks were resolved by a fourth independent reviewer (JEBH). Pathogens classified as stages 1 to 3 were retained. Pathogens classified as stage 4 or 5, where sustained chains of transmission between humans occur, were excluded from the review.

Pathogens or diseases included in the list of study zoonoses therefore included all pathogens and diseases that were:

- Identified through the WHO list, OIE list or preliminary zoonoses search approach AND
- Classified as a zoonoses<sup>2</sup> AND
- Classified as a stage 1, 2 or 3 zoonosis.<sup>5</sup>

The search concept for each pathogen or disease included exploded subject headings for both the pathogen and the diseases caused in humans and terms for both pathogen and disease were also included as keywords (e.g., exp anthrax/ OR anthrax.mp. OR exp Bacillus anthracis/ OR bacillus anthracis.mp.). In instances where pathogen species within the same genus varied in their zoonotic status, search concepts were constructed to include all zoonotic and non-zoonotic species and articles relating to non-zoonotic species were excluded at a later stage. Finally, the list of pathogen- or disease-specific searches were combined using OR syntax to generate the full 'zoonoses' search concept (Medline Search Syntax and Embase Search Syntax sections below).

58  
59  
60  
61  
62  
63  
64  
65  
66  
67  
68  
69  
70  
71  
72  
73  
74  
75  
76  
77  
78  
79  
80  
81  
82  
83  
84  
85  
86  
87  
88  
89  
90  
91  
92  
93  
94  
95  
96  
97  
98  
99  
100  
101  
102  
103  
104  
105  
106  
107  
108  
109  
110  
111  
112  
113  
114  
115  
116  
117

## Medline Search Syntax

(exp Anaplasmosis/ OR anaplasmosis.mp. OR exp Anaplasma/ OR anaplasma.mp.) [set database shortcode to 'pmez']  
(exp Babesiosis/ OR babesiosis.mp. OR exp Babesia/ OR babesia.mp.)  
(exp Anthrax/ OR anthrax.mp. OR exp Bacillus anthracis/ OR bacillus anthracis.mp.)  
(exp Bartonella Infections/ OR bartonellosis.mp. OR exp Bartonella/ OR bartonella.mp.)  
(exp Borrelia Infections/ OR borrelia Infection\$1.mp. OR exp Borrelia/ OR borrelia.mp.)  
(exp brucellosis/ OR brucellosis.mp. OR exp Brucella/ OR brucella.mp.)  
(exp Burkholderia Infections/ OR glanders.mp. OR exp Burkholderia/ OR burkholderia.mp.)  
(exp Campylobacter Infections/ OR exp Campylobacter/ OR campylobacter\$.mp.)  
(exp Psittacosis/ OR psittacosis.mp. OR exp Chlamydomphila psittaci/ OR chlamydomphila psittaci.mp.)  
(exp Cowpox/ OR exp Cowpox virus/ OR cowpox.mp.)  
(exp Q Fever/ OR q fever.mp. OR exp Coxiella/ OR coxiella.mp.)  
(exp Hemorrhagic Fever, Crimean/ OR crimean-congo h?emorrhagic fever.mp. OR exp Hemorrhagic Fever Virus, Crimean-Congo/ OR crimean-congo h?emorrhagic fever virus.mp.)  
(exp Hemorrhagic Fever, Ebola/ OR ebolavirus infection\$1.mp. OR exp Ebolavirus/ OR ebola\$.mp.)  
(exp Echinococcosis/ OR echinococcosis.mp. OR exp Echinococcus/ OR echinococcus.mp.)  
(exp Ehrlichiosis/ OR ehrlichiosis.mp. OR exp Ehrlichia/ OR ehrlichia.mp.)  
(exp Encephalomyelitis, Equine/ OR exp Encephalitis Virus, Eastern Equine/ OR exp Encephalitis Virus, Venezuelan Equine/ OR exp Encephalitis Virus, Western Equine/ OR equine encephalitis.mp. OR equine encephalomyelitis.mp.)  
(exp Escherichia coli Infections/ OR exp Escherichia coli/ OR escherichia coli.mp.)  
(exp "Foot-and-Mouth Disease"/ OR exp "Foot-and-Mouth Disease Virus"/ OR "foot and mouth disease".mp. OR "foot-and-mouth".mp.)  
(exp Tularemia/ OR tular?emia.mp. OR exp Francisella tularensis/ OR francisella tularensis.mp.)  
(exp Hantavirus Infections/ OR hantavirus infection\$1.mp. OR exp Hantavirus/ OR hantavirus.mp.)  
(exp Henipavirus Infections/ OR exp Henipavirus/ OR hendra.mp. OR nipah.mp. OR henipavirus.mp.)  
(exp Encephalitis, Japanese/ OR exp Encephalitis Virus, Japanese/ OR japanese encephalitis.mp.)  
(exp Lassa Fever/ OR exp Lassa virus/ OR lassa.mp.)  
(exp Leishmaniasis/ OR leishmaniasis.mp. OR exp Leishmania/ OR leishmania.mp.)  
(exp Leptospirosis/ OR leptospirosis.mp. OR exp Leptospira/ OR leptospira.mp.)  
(exp Listeriosis/ OR listeriosis.mp. OR exp Listeria/ OR listeria.mp.)  
(exp Marburg Virus Disease/ OR marburg h?emorrhagic fever.mp. OR exp Marburgvirus/ OR marburg\$.mp.)  
(exp Monkeypox/ OR exp Monkeypox virus/ OR monkeypox.mp.)  
(exp Tuberculosis, Bovine/ OR bovine tuberculosis.mp. OR exp Mycobacterium bovis/ OR mycobacterium bovis.mp.)  
(exp Paratuberculosis/ OR paratuberculosis.mp. OR exp "Mycobacterium avium subsp. paratuberculosis"/ OR mycobacterium paratuberculosis.mp.)  
(exp Newcastle Disease/ OR exp Newcastle disease virus/ OR newcastle disease.mp.)  
(exp Pasteurella Infections/ OR pasteurellosis.mp. OR exp Pasteurella/ OR pasteurella.mp.)  
(exp Prion Diseases/ OR exp Prions/ OR prion.mp.)  
(exp Rabies/ OR rabies.mp. OR exp Rabies virus/ OR rabies virus.mp.)  
(exp Rat-Bite Fever/ OR rat-bite.mp. OR rat bite.mp. OR exp Streptobacillus/ OR exp Spirillum/ OR streptobacillus.mp. OR spirillum.mp.)  
(exp Rickettsiaceae Infections/ OR rickettsiaceae infection\$1.mp. OR rickettsiosis.mp. OR exp Rickettsiaceae/ OR rickettsia.mp.)  
(exp Rift Valley Fever/ OR rift valley fever.mp. OR exp Rift Valley fever virus/ OR rift valley fever virus.mp.)  
(exp Salmonella Infections/ OR salmonellosis.mp. OR exp Salmonella/ OR salmonella.mp.)  
(exp Schistosomiasis/ OR schistosomiasis.mp. OR exp Schistosoma/ OR schistosoma.mp.)  
(exp Streptococcal Infections/ OR streptococcal.mp. OR exp Streptococcus/ OR streptococcus.mp.)  
(exp Pseudorabies/ OR pseudorabies.mp. OR exp Herpesvirus 1, Suid/ OR suid herpesvirus.mp. OR aujeszky\$.mp.)  
(exp Swine Vesicular Disease/ OR swine vesicular.mp. OR exp Enterovirus/ OR enterovirus.mp.)  
(exp Cysticercosis/ OR cysticercosis.mp. OR exp Taenia/ OR taenia.mp.)  
(exp Encephalitis, Tick-Borne/ OR tick borne encephalitis.mp. OR exp Encephalitis Viruses, Tick-Borne/ OR tick borne encephalitis virus.mp.)  
(exp Toxocariasis/ OR toxocariasis.mp. OR exp Toxocara/ OR toxocara.mp.)  
(exp Toxoplasmosis/ OR toxoplasmosis.mp. OR exp Toxoplasma/ OR toxoplasma.mp.)

118 (exp Trichinellosis/ OR trichinellosis.mp. OR exp Trichinella/ OR trichinella.mp.)  
119 (exp Trypanosomiasis/ OR trypanosomiasis.mp. OR exp Trypanosoma/ OR trypanosoma.mp.)  
120 (exp Vaccinia/ OR exp Vaccinia virus/ OR vaccinia.mp.)  
121 (exp Vesicular Stomatitis/ OR exp Vesiculovirus/ OR vesicular stomatitis.mp.)  
122 (exp West Nile Fever/ OR west nile fever.mp. OR exp West Nile virus/ OR west nile virus.mp.)  
123 (exp Yersinia Infections/ OR yersinia infection\$.mp. OR exp Yersinia/ OR yersinia.mp. OR plague.mp.)  
124 (exp "Georgia (Republic)"/ OR "Georgia (Republic)".mp.)  
125 (exp Afghanistan/ OR Afghanistan.mp.)  
126 (exp Algeria/ OR Algeria.mp.)  
127 (exp Angola/ OR Angola.mp.)  
128 (exp Argentina/ OR Argentina.mp.)  
129 (exp Armenia/ OR Armenia.mp.)  
130 (exp Azerbaijan/ OR Azerbaijan.mp.)  
131 (exp Bahamas/ OR Bahamas.mp.)  
132 (exp Bangladesh/ OR Bangladesh.mp.)  
133 (exp Belize/ OR Belize.mp.)  
134 (exp Benin/ OR Benin.mp.)  
135 (exp Bhutan/ OR Bhutan.mp.)  
136 (exp Bolivia/ OR Bolivia.mp.)  
137 (exp Botswana/ OR Botswana.mp.)  
138 (exp Brazil/ OR Brazil.mp.)  
139 (exp Burkina Faso/ OR Burkina Faso.mp.)  
140 (exp Burundi/ OR Burundi.mp.)  
141 (exp Cambodia/ OR Cambodia.mp.)  
142 (exp Cameroon/ OR Cameroon.mp.)  
143 (exp Cape Verde/ OR Cape Verde.mp.)  
144 (exp Central African Republic/ OR Central African Republic.mp.)  
145 (exp Chad/ OR Chad.mp.)  
146 (exp China/ OR China.mp.)  
147 (exp Colombia/ OR Colombia.mp.)  
148 (exp Comoros/ OR Comoros.mp.)  
149 (exp Congo/ OR Congo.mp.)  
150 (exp Costa Rica/ OR Costa Rica.mp.)  
151 (exp Cote d'Ivoire/ OR Cote d'Ivoire.mp.)  
152 (exp Democratic People's Republic of Korea/ OR Democratic People's Republic of Korea.mp.)  
153 (exp Democratic Republic of the Congo/ OR Democratic Republic of the Congo.mp.)  
154 (exp Djibouti/ OR Djibouti.mp.)  
155 (exp Dominican Republic/ OR Dominican Republic.mp.)  
156 (exp East Timor/ OR East Timor.mp.)  
157 (exp Ecuador/ OR Ecuador.mp.)  
158 (exp Egypt/ OR Egypt.mp.)  
159 (exp El Salvador/ OR El Salvador.mp.)  
160 (exp Equatorial Guinea/ OR Equatorial Guinea.mp.)  
161 (exp Eritrea/ OR Eritrea.mp.)  
162 (exp Ethiopia/ OR Ethiopia.mp.)  
163 (exp French Guiana/ OR French Guiana.mp.)  
164 (exp Gabon/ OR Gabon.mp.)  
165 (exp Gambia/ OR Gambia.mp.)  
166 (exp Ghana/ OR Ghana.mp.)  
167 (exp Guatemala/ OR Guatemala.mp.)  
168 (exp Guinea/ OR Guinea.mp.)  
169 (exp Guinea-Bissau/ OR Guinea-Bissau.mp.)  
170 (exp Guyana/ OR Guyana.mp.)  
171 (exp Haiti/ OR Haiti.mp.)  
172 (exp Honduras/ OR Honduras.mp.)  
173 (exp India/ OR India.mp.)  
174 (exp Indonesia/ OR Indonesia.mp.)  
175 (exp Iran/ OR Iran.mp.)  
176 (exp Iraq/ OR Iraq.mp.)  
177 (exp Jamaica/ OR Jamaica.mp.)

178 (exp Kenya/ OR Kenya.mp.)  
179 (exp Kyrgyzstan/ OR Kyrgyzstan.mp.)  
180 (exp Laos/ OR Laos.mp.)  
181 (exp Liberia/ OR Liberia.mp.)  
182 (exp Madagascar/ OR Madagascar.mp.)  
183 (exp Malawi/ OR Malawi.mp.)  
184 (exp Malaysia/ OR Malaysia.mp.)  
185 (exp Mali/ OR Mali.mp.)  
186 (exp Mauritania/ OR Mauritania.mp.)  
187 (exp Mauritius/ OR Mauritius.mp.)  
188 (exp Mexico/ OR Mexico.mp.)  
189 (exp Morocco/ OR Morocco.mp.)  
190 (exp Mozambique/ OR Mozambique.mp.)  
191 (exp Myanmar/ OR Myanmar.mp.)  
192 (exp Namibia/ OR Namibia.mp.)  
193 (exp Nepal/ OR Nepal.mp.)  
194 (exp Nicaragua/ OR Nicaragua.mp.)  
195 (exp Niger/ OR Niger.mp.)  
196 (exp Nigeria/ OR Nigeria.mp.)  
197 (exp Oman/ OR Oman.mp.)  
198 (exp Pakistan/ OR Pakistan.mp.)  
199 (exp Panama/ OR Panama.mp.)  
200 (exp Papua New Guinea/ OR Papua New Guinea.mp.)  
201 (exp Paraguay/ OR Paraguay.mp.)  
202 (exp Peru/ OR Peru.mp.)  
203 (exp Philippines/ OR Philippines.mp.)  
204 (exp Republic of Korea/ OR Republic of Korea.mp.)  
205 (exp Russia/ OR Russia.mp.)  
206 (exp Rwanda/ OR Rwanda.mp.)  
207 (exp Sao Tome/ OR Sao Tome.mp.)  
208 (exp Saudi Arabia/ OR Saudi Arabia.mp.)  
209 (exp Senegal/ OR Senegal.mp.)  
210 (exp Sierra Leone/ OR Sierra Leone.mp.)  
211 (exp Solomon Islands/ OR Solomon Islands.mp.)  
212 (exp Somalia/ OR Somalia.mp.)  
213 (exp South Africa/ OR South Africa.mp.)  
214 (exp Sri Lanka/ OR Sri Lanka.mp.)  
215 (exp Sudan/ OR Sudan.mp.)  
216 (exp Suriname/ OR Suriname.mp.)  
217 (exp Swaziland/ OR Swaziland.mp.)  
218 (exp Syria/ OR Syria.mp.)  
219 (exp Tajikistan/ OR Tajikistan.mp.)  
220 (exp Tanzania/ OR Tanzania.mp.)  
221 (exp Thailand/ OR Thailand.mp.)  
222 (exp Togo/ OR Togo.mp.)  
223 (exp Turkey/ OR Turkey.mp.)  
224 (exp Turkmenistan/ OR Turkmenistan.mp.)  
225 (exp Uganda/ OR Uganda.mp.)  
226 (exp Uzbekistan/ OR Uzbekistan.mp.)  
227 (exp Vanuatu/ OR Vanuatu.mp.)  
228 (exp Venezuela/ OR Venezuela.mp.)  
229 (exp Vietnam/ OR Vietnam.mp.)  
230 (exp Yemen/ OR Yemen.mp.)  
231 (exp Zambia/ OR Zambia.mp.)  
232 (exp Zimbabwe/ OR Zimbabwe.mp.)  
233 (exp Africa/ OR africa.mp.)  
234 (exp Fever/ OR fever\$1.mp. OR febrile.mp.)  
235 or/1-52  
236 or/53-162  
237 164 AND 165

238 163 AND 166  
239 ..1/167 yr=2004-2019  
240  
241

242  
243  
244  
245  
246  
247  
248  
249  
250  
251  
252  
253  
254  
255  
256  
257  
258  
259  
260  
261  
262  
263  
264  
265  
266  
267  
268  
269  
270  
271  
272  
273  
274  
275  
276  
277  
278  
279  
280  
281  
282  
283  
284  
285  
286  
287  
288  
289  
290  
291  
292  
293  
294  
295  
296  
297  
298  
299  
300  
301

## Embase Search Syntax

(exp anaplasmosis/ OR exp human granulocytic anaplasmosis/ OR anaplasmosis.mp. OR exp Anaplasma/ OR anaplasma.mp.) [set database shortcode to 'emczd']  
(exp babesiosis/ OR babesiosis.mp. OR exp Babesia/ OR babesia.mp.)  
(exp anthrax/ OR anthrax.mp. OR exp Bacillus anthracis/ OR bacillus anthracis.mp.)  
(exp bartonellosis/ OR bartonellosis.mp. OR exp Bartonella/ OR bartonella.mp.)  
(exp Borrelia infection/ OR borrelia Infection\$1.mp. OR exp Borrelia/ OR borrelia.mp.)  
(exp brucellosis/ OR brucellosis.mp. OR exp Brucella/ OR brucella.mp.)  
(exp Burkholderia infection/ OR glanders.mp. OR exp Burkholderia/ OR burkholderia.mp.)  
(exp campylobacteriosis/ OR exp Campylobacter/ OR campylobacter\$.mp.)  
(exp ornithosis/ OR psittacosis.mp. OR exp Chlamydophila psittaci/ OR chlamydophila psittaci.mp.)  
(exp cowpox/ OR exp Cowpox virus/ OR cowpox.mp.)  
(exp Q fever/ OR q fever.mp. OR exp Coxiella/ OR coxiella.mp.)  
(exp Crimean Congo hemorrhagic fever/ OR crimean-congo h?emorrhagic fever.mp. OR exp Nairo virus/ OR crimean-congo h?emorrhagic fever virus.mp.)  
(exp Ebola hemorrhagic fever/ OR ebolavirus infection\$1.mp. OR exp Ebola virus/ OR ebola\$.mp.)  
(exp echinococcosis/ OR echinococcosis.mp. OR exp Echinococcus/ OR echinococcus.mp.)  
(exp ehrlichiosis/ OR ehrlichiosis.mp. OR exp Ehrlichia/ OR ehrlichia.mp.)  
(exp Eastern equine encephalitis/ OR exp Venezuelan equine encephalitis/ OR exp Western equine encephalitis/ OR exp Eastern equine encephalomyelitis virus/ OR exp Venezuelan equine encephalomyelitis alphavirus/ OR exp Western equine encephalomyelitis alphavirus/ OR equine encephalitis.mp. OR equine encephalomyelitis.mp.)  
(exp Escherichia coli infection/ OR exp Escherichia coli/ OR escherichia coli.mp.)  
(exp "foot and mouth disease"/ OR exp "Foot and mouth disease virus"/ OR "foot and mouth disease".mp. OR "foot-and-mouth".mp.)  
(exp tularemia/ OR tular?emia.mp. OR exp Francisella tularensis/ OR francisella tularensis.mp.)  
(exp Hantavirus infection/ OR hantavirus infection\$1.mp. OR exp Hantavirus/ OR hantavirus.mp.)  
(exp Nipah virus infection/ OR exp Hendra virus infection/ OR exp Nipah virus/ OR exp Hendra virus/ OR hendra.mp. OR nipah.mp. OR henipavirus.mp.)  
(exp Japanese encephalitis/ OR exp Japanese encephalitis virus/ OR japanese encephalitis.mp.)  
(exp Lassa fever/ OR exp Lassa virus/ OR lassa.mp.)  
(exp leishmaniasis/ OR leishmaniasis.mp. OR exp Leishmania/ OR leishmania.mp.)  
(exp leptospirosis/ OR leptospirosis.mp. OR exp Leptospira/ OR leptospira.mp.)  
(exp listeriosis/ OR listeriosis.mp. OR exp Listeria/ OR listeria.mp.)  
(exp Marburg hemorrhagic fever/ OR marburg h?emorrhagic fever.mp. OR exp Marburg virus/ OR marburg\$.mp.)  
(exp monkeypox/ OR exp Monkeypox virus/ OR monkeypox.mp.)  
(exp bovine tuberculosis/ OR bovine tuberculosis.mp. OR exp Mycobacterium bovis/ OR mycobacterium bovis.mp.)  
(exp paratuberculosis/ OR paratuberculosis.mp. OR exp Mycobacterium paratuberculosis/ OR mycobacterium paratuberculosis.mp.)  
(exp Newcastle disease/ OR exp Newcastle disease paramyxovirus/ OR newcastle disease.mp.)  
(exp pasteurellosis/ OR pasteurellosis.mp. OR exp Pasteurella/ OR pasteurella.mp.)  
(exp prion disease/ OR exp prion/ OR prion.mp.)  
(exp rabies/ OR rabies.mp. OR exp Rabies virus/ OR rabies virus.mp.)  
(exp rat bite fever/ OR rat-bite.mp. OR rat bite.mp. OR exp Streptobacillus/ OR exp Spirillum/ OR streptobacillus.mp. OR spirillum.mp.)  
(exp Rickettsiaceae infection/ OR rickettsiaceae infection\$1.mp. OR rickettsiosis.mp. OR exp Rickettsiaceae/ OR rickettsia.mp.)  
(exp Rift Valley fever/ OR rift valley fever.mp. OR exp Rift Valley fever bunyavirus/ OR rift valley fever virus.mp.)  
(exp salmonellosis/ OR exp animal salmonellosis/ OR salmonellosis.mp. OR exp Salmonella/ OR salmonella.mp.)  
(exp schistosomiasis/ OR schistosomiasis.mp. OR exp Schistosoma/ OR schistosoma.mp.)  
(exp Streptococcus infection/ OR streptococcal.mp. OR exp Streptococcus/ OR streptococcus.mp.)  
(exp pseudorabies/ OR pseudorabies.mp. OR exp Pseudorabies herpesvirus/ OR suid herpesvirus.mp. OR aujeszky\$.mp.)  
(exp swine vesicular disease/ OR swine vesicular.mp. OR exp Enterovirus/ OR enterovirus.mp.)

302 (exp cysticercosis/ OR cysticercosis.mp. OR exp Taenia/ OR taenia.mp.)  
303 (exp tick borne encephalitis/ OR tick borne encephalitis.mp. OR exp Tick borne encephalitis flavivirus/ OR tick  
304 borne encephalitis virus.mp.)  
305 (exp toxocariasis/ OR toxocariasis.mp. OR exp Toxocara/ OR toxocara.mp.)  
306 (exp toxoplasmosis/ OR exp congenital toxoplasmosis/ OR toxoplasmosis.mp. OR exp Toxoplasma/ OR  
307 toxoplasma.mp.)  
308 (exp trichinosis/ OR trichinellosis.mp. OR exp Trichinella/ OR trichinella.mp.)  
309 (exp trypanosomiasis/ OR trypanosomiasis.mp. OR exp Trypanosoma/ OR trypanosoma.mp.)  
310 (exp vaccinia/ OR exp Vaccinia virus/ OR vaccinia.mp.)  
311 (exp vesicular stomatitis/ OR exp Vesicular stomatitis virus/ OR vesicular stomatitis.mp.)  
312 (exp West Nile fever/ OR west nile fever.mp. OR exp West Nile flavivirus/ OR west nile virus.mp.)  
313 (exp Yersinia infection/ OR yersinia infection\$.mp. OR exp Yersinia/ OR yersinia.mp. OR plague.mp.)  
314 (exp "Georgia (republic)"/ OR "Georgia (republic)".mp.)  
315 (exp "Turkey (republic)"/ OR "Turkey (republic)".mp.)  
316 (exp Afghanistan/ OR Afghanistan.mp.)  
317 (exp Algeria/ OR Algeria.mp.)  
318 (exp Angola/ OR Angola.mp.)  
319 (exp Argentina/ OR Argentina.mp.)  
320 (exp Armenia/ OR Armenia.mp.)  
321 (exp Azerbaijan/ OR Azerbaijan.mp.)  
322 (exp Bahamas/ OR Bahamas.mp.)  
323 (exp Bangladesh/ OR Bangladesh.mp.)  
324 (exp Belize/ OR Belize.mp.)  
325 (exp Benin/ OR Benin.mp.)  
326 (exp Bhutan/ OR Bhutan.mp.)  
327 (exp Bolivia/ OR Bolivia.mp.)  
328 (exp Botswana/ OR Botswana.mp.)  
329 (exp Brazil/ OR Brazil.mp.)  
330 (exp Burkina Faso/ OR Burkina Faso.mp.)  
331 (exp Burundi/ OR Burundi.mp.)  
332 (exp Cambodia/ OR Cambodia.mp.)  
333 (exp Cameroon/ OR Cameroon.mp.)  
334 (exp Cape Verde/ OR Cape Verde.mp.)  
335 (exp Central African Republic/ OR Central African Republic.mp.)  
336 (exp Chad/ OR Chad.mp.)  
337 (exp China/ OR China.mp.)  
338 (exp Colombia/ OR Colombia.mp.)  
339 (exp Comoros/ OR Comoros.mp.)  
340 (exp Congo/ OR Congo.mp.)  
341 (exp Costa Rica/ OR Costa Rica.mp.)  
342 (exp Cote d'Ivoire/ OR Cote d'Ivoire.mp.)  
343 (exp Democratic Republic Congo/ OR Democratic Republic Congo.mp.)  
344 (exp Djibouti/ OR Djibouti.mp.)  
345 (exp Dominican Republic/ OR Dominican Republic.mp.)  
346 (exp Ecuador/ OR Ecuador.mp.)  
347 (exp Egypt/ OR Egypt.mp.)  
348 (exp El Salvador/ OR El Salvador.mp.)  
349 (exp Equatorial Guinea/ OR Equatorial Guinea.mp.)  
350 (exp Eritrea/ OR Eritrea.mp.)  
351 (exp Ethiopia/ OR Ethiopia.mp.)  
352 (exp French Guiana/ OR French Guiana.mp.)  
353 (exp Gabon/ OR Gabon.mp.)  
354 (exp Gambia/ OR Gambia.mp.)  
355 (exp Ghana/ OR Ghana.mp.)  
356 (exp Guatemala/ OR Guatemala.mp.)  
357 (exp Guinea/ OR Guinea.mp.)  
358 (exp Guinea-Bissau/ OR Guinea-Bissau.mp.)  
359 (exp Guyana/ OR Guyana.mp.)  
360 (exp Haiti/ OR Haiti.mp.)  
361 (exp Honduras/ OR Honduras.mp.)

362 (exp India/ OR India.mp.)  
363 (exp Indonesia/ OR Indonesia.mp.)  
364 (exp Iran/ OR Iran.mp.)  
365 (exp Iraq/ OR Iraq.mp.)  
366 (exp Jamaica/ OR Jamaica.mp.)  
367 (exp Kenya/ OR Kenya.mp.)  
368 (exp Kyrgyzstan/ OR Kyrgyzstan.mp.)  
369 (exp Laos/ OR Laos.mp.)  
370 (exp Liberia/ OR Liberia.mp.)  
371 (exp Madagascar/ OR Madagascar.mp.)  
372 (exp Malawi/ OR Malawi.mp.)  
373 (exp Malaysia/ OR Malaysia.mp.)  
374 (exp Mali/ OR Mali.mp.)  
375 (exp Mauritania/ OR Mauritania.mp.)  
376 (exp Mauritius/ OR Mauritius.mp.)  
377 (exp Mexico/ OR Mexico.mp.)  
378 (exp Morocco/ OR Morocco.mp.)  
379 (exp Mozambique/ OR Mozambique.mp.)  
380 (exp Myanmar/ OR Myanmar.mp.)  
381 (exp Namibia/ OR Namibia.mp.)  
382 (exp Nepal/ OR Nepal.mp.)  
383 (exp Nicaragua/ OR Nicaragua.mp.)  
384 (exp Niger/ OR Niger.mp.)  
385 (exp Nigeria/ OR Nigeria.mp.)  
386 (exp North Korea/ OR North Korea.mp.)  
387 (exp Oman/ OR Oman.mp.)  
388 (exp Pakistan/ OR Pakistan.mp.)  
389 (exp Panama/ OR Panama.mp.)  
390 (exp Papua New Guinea/ OR Papua New Guinea.mp.)  
391 (exp Paraguay/ OR Paraguay.mp.)  
392 (exp Peru/ OR Peru.mp.)  
393 (exp Philippines/ OR Philippines.mp.)  
394 (exp Russian Federation/ OR Russian Federation.mp.)  
395 (exp Rwanda/ OR Rwanda.mp.)  
396 (exp Sao Tome and Principe/ OR Sao Tome and Principe.mp.)  
397 (exp Saudi Arabia/ OR Saudi Arabia.mp.)  
398 (exp Senegal/ OR Senegal.mp.)  
399 (exp Sierra Leone/ OR Sierra Leone.mp.)  
400 (exp Solomon Islands/ OR Solomon Islands.mp.)  
401 (exp Somalia/ OR Somalia.mp.)  
402 (exp South Africa/ OR South Africa.mp.)  
403 (exp South Korea/ OR South Korea.mp.)  
404 (exp Sri Lanka/ OR Sri Lanka.mp.)  
405 (exp Sudan/ OR Sudan.mp.)  
406 (exp Suriname/ OR Suriname.mp.)  
407 (exp Swaziland/ OR Swaziland.mp.)  
408 (exp Syrian Arab Republic/ OR Syrian Arab Republic.mp.)  
409 (exp Tajikistan/ OR Tajikistan.mp.)  
410 (exp Tanzania/ OR Tanzania.mp.)  
411 (exp Thailand/ OR Thailand.mp.)  
412 (exp Timor-Leste/ OR Timor-Leste.mp.)  
413 (exp Togo/ OR Togo.mp.)  
414 (exp Turkmenistan/ OR Turkmenistan.mp.)  
415 (exp Uganda/ OR Uganda.mp.)  
416 (exp Uzbekistan/ OR Uzbekistan.mp.)  
417 (exp Vanuatu/ OR Vanuatu.mp.)  
418 (exp Venezuela/ OR Venezuela.mp.)  
419 (exp Viet Nam/ OR Viet Nam.mp.)  
420 (exp Yemen/ OR Yemen.mp.)  
421 (exp Zambia/ OR Zambia.mp.)



422 (exp Zimbabwe/ OR Zimbabwe.mp.)  
423 (exp Africa/ OR africa.mp)  
424 (exp fever/ OR fever\$.mp. OR febrile.mp.)  
425 or/1-52  
426 or/53-162  
427 164 AND 165  
428 163 AND 166  
429 ..1/167 yr=2004-2019  
430  
431

432  
433  
434  
435  
436  
437  
438  
439

### Abstract Screening

Conference proceedings, records that did not include any abstract text, and records that did not have an abstract in English were excluded. Remaining records were evaluated against the criteria listed in table S1. Records that did not present data from a malaria-endemic country were also excluded. Full text articles were sought for all articles not excluded at the abstract review step.

**Table S1. Criteria applied for abstract screening.**

| Criterion         | Guidance                                                                                                                                                                                                                                                                          | Outcome                                                                           |
|-------------------|-----------------------------------------------------------------------------------------------------------------------------------------------------------------------------------------------------------------------------------------------------------------------------------|-----------------------------------------------------------------------------------|
| Inc1FeverPopn     | Does the Title/Abstract refer to clinical and/or laboratory evaluation of a group of two or more humans that are explicitly described using one or more of the of the following terms:<br>Febrile / fever(s) / pyrexia(s) /temperature $\geq 38.0C$ / body temperature elevation? | If Yes, retain and evaluate<br>Inc1ZooPath.<br><br>If No, exclude.                |
| Inc1ZooPath       | Does the Title/Abstract refer to diagnosis of this febrile population with one or more of the pathogens/diseases included in this study (table 1 in main paper)?                                                                                                                  | If Yes, retain and evaluate<br>Exc1PathogenFocus.<br><br>If No, evaluate Inc1Bcx. |
| Inc1Bcx           | Does the Title/Abstract refer to the use of blood culture for the diagnosis of this febrile population?                                                                                                                                                                           | If Yes, retain and evaluate<br>Exc1PathogenFocus.<br><br>If No, exclude.          |
| Exc1PathogenFocus | Does the Title/Abstract refer to a group of two or more humans that are principally classified on the basis of a common (i.e. 100% frequency) aetiological diagnosis, some proportion of which may also have fever?                                                               | If Yes, exclude.<br><br>If No, retain for full text review.                       |

440  
441  
442  
443  
444

### Full Text Review

Full text articles were evaluated by two independent reviewers against the criteria listed in table S2.

**Table S2. Criteria applied for full text review of articles.**

| Criterion  | Guidance                                                                                                                                                                                                                                                                                                                                                                                                                                                                                                                                                                                                                                                                                                                                                                                                                                                                                                                                                                                                                                             | Outcome                                                                                         |
|------------|------------------------------------------------------------------------------------------------------------------------------------------------------------------------------------------------------------------------------------------------------------------------------------------------------------------------------------------------------------------------------------------------------------------------------------------------------------------------------------------------------------------------------------------------------------------------------------------------------------------------------------------------------------------------------------------------------------------------------------------------------------------------------------------------------------------------------------------------------------------------------------------------------------------------------------------------------------------------------------------------------------------------------------------------------|-------------------------------------------------------------------------------------------------|
| Inc2FP     | Does the article provide details/inclusion criteria for one or more human population(s) (of more than one person) that explicitly includes acute fever/febrile illness as part of the inclusion criteria?                                                                                                                                                                                                                                                                                                                                                                                                                                                                                                                                                                                                                                                                                                                                                                                                                                            | If Yes, retain and evaluate<br>Inc2ZP.<br><br>If No, exclude.                                   |
| Inc2ZP     | Does the article provide data on the diagnosis of a zoonotic pathogen as defined on the species level list (table 1 in main paper)?                                                                                                                                                                                                                                                                                                                                                                                                                                                                                                                                                                                                                                                                                                                                                                                                                                                                                                                  | If Yes, retain and evaluate<br>Inc2DT.<br><br>If No, exclude.                                   |
| Inc2DT     | Does the article provide details of one or more diagnostic test procedure(s) for one or more of the zoonotic pathogens included in this study that meets >1 of the following criteria and are used to test >1 febrile people?<br>1 – culture of the pathogen from sample(s) collected from a febrile person<br>2 – direct detection of the pathogen (e.g., by PCR based techniques) from sample(s) collected from a febrile person<br>3 – serological diagnosis of acute infection based on testing of both acute and convalescent phase serum samples and demonstration of seroconversion<br>4 – diagnosis of acute infection based on detection of pathogen-specific antibody or antigens in a single serum sample only for selected pathogens, for which widely accepted case definitions deemed pathogen-specific antibody or antigen detection sufficiently accurate (table 2 in main paper)<br>5 – IgM detection in CSF for selected pathogens for which widely accepted case definitions include IgM detection in CSF (table 2 in main paper) | If Yes, retain, record coding of valid tests and evaluate<br>Exc2nTests.<br><br>If No, exclude. |
| Exc2nTests | Does the article lack detail on the number of people tested for each study pathogen with each testing method/case definition that meets the above criteria?                                                                                                                                                                                                                                                                                                                                                                                                                                                                                                                                                                                                                                                                                                                                                                                                                                                                                          | If Yes, exclude.<br><br>If No, retain and evaluate<br>Exc2AllNeg.                               |
| Exc2AllNeg | Does the article give the number of people tested for a study pathogen with a test method/case definition that meets the above criteria, but all tested individuals are negative?                                                                                                                                                                                                                                                                                                                                                                                                                                                                                                                                                                                                                                                                                                                                                                                                                                                                    | If Yes, exclude.<br><br>If No, retain and evaluate<br>Exc2DV.                                   |
| Exc2DV     | Does the article present data from a study designed to evaluate diagnostic test and/or vaccine performance without presenting ‘new data’ on the number/proportion of patients diagnosed with pathogen x from a described population of febrile humans?                                                                                                                                                                                                                                                                                                                                                                                                                                                                                                                                                                                                                                                                                                                                                                                               | If Yes, exclude.<br><br>If No, retain and evaluate<br>Exc2Rev.                                  |
| Exc2Rev    | Does the article provide a review of previously published data only, without presenting ‘new’ primary data on the number/proportion of patients diagnosed with pathogen x?                                                                                                                                                                                                                                                                                                                                                                                                                                                                                                                                                                                                                                                                                                                                                                                                                                                                           | If Yes, exclude.<br><br>If No, retain and evaluate<br>Exc2PF.                                   |

|        |                                                                                                                                                                                                               |                                                                              |
|--------|---------------------------------------------------------------------------------------------------------------------------------------------------------------------------------------------------------------|------------------------------------------------------------------------------|
| Exc2PF | Does the article refer to a group of two or more humans that are principally classified on the basis of a common (e.g., 100% frequency) aetiological diagnosis, some proportion of which may also have fever? | If Yes, exclude.<br><br>If No, retain and carry forward for data extraction. |
|--------|---------------------------------------------------------------------------------------------------------------------------------------------------------------------------------------------------------------|------------------------------------------------------------------------------|

445  
446  
447  
448  
449  
450  
451  
452  
453  
454  
455  
456  
457  
458  
459  
460  
461  
462  
463  
464  
465  
466  
467  
468  
469  
470  
471

### Data extraction

Articles were excluded during data extraction if they did not meet one or more of the study inclusion criteria or did meet one or more of the exclusion criteria described above for full text review. For all included studies, data were extracted in two stages. First, article level data were extracted following the guidance given in table S3.

Article level data collection on individual pathogens included the names of each of the zoonotic pathogens that the article described diagnostic methods for and the names of the zoonotic pathogens that were diagnosed in the study. These classifications record the named zoonoses that each study reported looking for and diagnosing, irrespective of the diagnostic approach used or level of detail given.

At the second step, data were extracted the for each combination of zoonotic pathogen and diagnostic test approach that met study validity criteria following the guidance given in table S4. In instances where more than one diagnostic method was used for a given pathogen (e.g., culture and serology-based case definitions), data on the total number of individuals tested and positive using valid diagnostics for a given pathogen were aggregated. Data were only extracted for diagnosed pathogens and no data were extracted for pathogens not identified, even when common diagnostic approaches were used. For example, in studies conducting blood cultures the number of individuals tested and positive for each identified zoonosis were extracted but no data were extracted on the number of individuals who tested negative for other pathogens that could be identified by that blood culture.

When duplicate records were identified, e.g., when two articles reported identical data on pathogen detection in the same population, the later duplicate record was removed from the dataset for analysis.

Extracted data were used to classify study and outcome level attributes according to the pre-defined criteria for bias assessment given in table S5.

**Table S3. Data extracted for each article included in the review.**

| Data to be extracted                     | Guidance                                                                                                                                                                                                                                                                                                                                                                                                |
|------------------------------------------|---------------------------------------------------------------------------------------------------------------------------------------------------------------------------------------------------------------------------------------------------------------------------------------------------------------------------------------------------------------------------------------------------------|
| Country and WHO region                   | Record the country or countries in which the reported study was conducted (i.e. the country where the febrile population was identified, and data were collected). Country name spellings and regional classifications are as defined by the WHO.                                                                                                                                                       |
| Start year of data collection            | Record the start year for the period over which the reported study was conducted (i.e. the period when the febrile population was identified, and data were collected).                                                                                                                                                                                                                                 |
| End of data collection                   | Record the end year for the period over which the reported study was conducted (i.e. the period when the febrile population was identified, and data were collected).                                                                                                                                                                                                                                   |
| Fever population description             | Record a general description of the febrile population investigated in this study.                                                                                                                                                                                                                                                                                                                      |
| Fever population eligibility             | Record the inclusion and exclusion criteria used to define eligibility of participants in this study.                                                                                                                                                                                                                                                                                                   |
| Specific aetiologies excluded            | Record if patients with any specific aetiologies or syndromes were excluded in this study. Generalised exclusions such as “known causes of fever”, “obvious focus of infection” or “obvious explanations of febrile illness” were not classified here.                                                                                                                                                  |
| Details of exclusions                    | Record the details of the named aetiologies and/or syndromes excluded.                                                                                                                                                                                                                                                                                                                                  |
| Differentiated or undifferentiated fever | Classify each study population as undifferentiated febrile population or differentiated febrile population according to the reported clinical presentation.                                                                                                                                                                                                                                             |
| Febrile population classification        | Classify differentiated febrile populations as: i) febrile neurologic presentation; ii) febrile haemorrhagic presentation; iii) febrile gastrointestinal presentation; iv) febrile respiratory presentation; v) specific febrile aetiology suspected (i.e., leishmaniasis, leptospirosis, plague, and rickettsiosis); vi) fever in a high specific co-morbid group (i.e. malignancy, immunocompromise). |
| Age                                      | Record details provided about the ages of the febrile population                                                                                                                                                                                                                                                                                                                                        |
| Demographic restriction                  | Record the details of any demographic restriction of the study population e.g., restriction of the study population to individuals meeting specific criteria for age or sex.                                                                                                                                                                                                                            |
| Urban or rural population                | Record whether or not the study was conducted in a predominantly urban population, predominantly rural or mixed.                                                                                                                                                                                                                                                                                        |
| Inpatient or outpatient population       | Record whether or not the febrile population described were inpatients (e.g., admitted to a healthcare facility), outpatients (e.g., patients seeking care at a healthcare facility but apparently not admitted) or if the study was population-based.                                                                                                                                                  |
| Outbreak                                 | Record whether or not the study reports that data collection was conducted during a reported outbreak or not and the disease/syndrome described if Yes.                                                                                                                                                                                                                                                 |

|                                                     |                                                                                                                                                                                                                                                     |
|-----------------------------------------------------|-----------------------------------------------------------------------------------------------------------------------------------------------------------------------------------------------------------------------------------------------------|
| Zoonotic pathogens diagnosed among febrile patients | Was any proportion of the reported febrile population diagnosed with a zoonotic pathogen?                                                                                                                                                           |
| Pathogens looked for                                | For each zoonosis mentioned in the article record 1 if the article describes a diagnostic approach taken to identify individuals infected with that pathogen. Record 0 for each zoonosis where this is not the case.                                |
| Pathogens diagnosed                                 | For each zoonosis mentioned in the article record 1 if the article reports more than one member of a febrile population diagnosed with this pathogen (irrespective of the diagnostics used). Record 0 for each zoonosis where this is not the case. |

472

473

**Table S4. Data extracted for each zoonotic pathogen diagnosed by a valid method.**

| Data to be extracted                                                           | Guidance                                                                                                                                    |
|--------------------------------------------------------------------------------|---------------------------------------------------------------------------------------------------------------------------------------------|
| Zoonotic pathogen identified                                                   | Record the pathogen diagnosed using valid diagnostic methods.                                                                               |
| Type of sample                                                                 | Record the details of the sample(s) tested with each specific test/approach.                                                                |
| Diagnostic method used                                                         | Record the type of diagnostic test(s) used for each specific test/approach.                                                                 |
| Number of individuals tested for that pathogen by valid methods                | Record the number of febrile patients tested using the valid diagnostics described in this row of the dataset specifically.                 |
| Number of individuals diagnosed as positive for that pathogen by valid methods | Record the number of febrile patients classified as positive using the valid diagnostics described in this row of the dataset specifically. |
| Indicator for multiple diagnostic methods for given pathogen in this reference | Record Yes (1) if there is more than one row of data for this pathogen and reference combination.                                           |

474

475

**Bias evaluation**

476

Each population was classified as low, medium or high risk of bias against the representativeness and precision criteria as detailed in table S5.

477

478

479

**Table S5. Criteria for bias assessment and classification of study and population level attributes.**

| Criteria                                              | Risk of bias classification | Description                                                                                                            |
|-------------------------------------------------------|-----------------------------|------------------------------------------------------------------------------------------------------------------------|
| Study representativeness                              | Low                         | Undifferentiated febrile population with no demographic restriction and no aetiologies or syndromes excluded.          |
|                                                       | Medium                      | Undifferentiated febrile population with demographic restriction or one or more aetiologies and/or syndromes excluded. |
|                                                       | High                        | Febrile population classified as differentiated (table S4) or sampled during an identified disease outbreak.           |
| Precision of percentage fevers attributed to zoonosis | Low                         | Number of individual tested > 385.                                                                                     |
|                                                       | Medium                      | Number of individuals tested > 139 and ≤385.                                                                           |
|                                                       | High                        | Number of individuals tested ≤ 139.                                                                                    |

480

481

482  
483  
484  
485  
486  
487  
488  
489  
490

## Results

**Table S6: Characteristics and summary of the 244 articles and 309 records of zoonosis diagnosis included in the review.**

Study population abbreviations: UN = undifferentiated; D = differentiated; COMORBID = febrile co-morbid group GI = febrile gastrointestinal; HEM = febrile haemorrhagic; NEU = febrile neurological; RESP; febrile respiratory; SP = specific febrile aetiology suspected.

Diagnostics abbreviations: ELISA = enzyme linked immunosorbent assay; HI = haemagglutination inhibition test; IFA = immunofluorescence assay; IgM = IgM detection; MAT = microscopic agglutination test; PCR = polymerase chain reaction-based test; PRNT = plaque reduction neutralisation test. When multiple diagnostics used different tests are separated by “,”.

An excel format version of this table, including additional data fields is accessible at: <http://dx.doi.org/10.5525/gla.researchdata.890>

| Pathogen                         | First author, year of publication and reference | Country                     | Study Period | Study Population Classification | Diagnostics Used  | Number Tested | Number Positive | Representativeness Bias Coding | Precision Bias Coding |
|----------------------------------|-------------------------------------------------|-----------------------------|--------------|---------------------------------|-------------------|---------------|-----------------|--------------------------------|-----------------------|
| <i>Anaplasma phagocytophilum</i> | Lee et al. (2018) <sup>6</sup>                  | Republic of Korea           | 2015-2017    | UN                              | PCR               | 380           | 14              | Medium                         | Medium                |
| <i>Anaplasma phagocytophilum</i> | Yi et al. (2017) <sup>7</sup>                   | Republic of Korea           | 2003-2012    | UN                              | PCR               | 70            | 5               | Low                            | High                  |
| <i>Anaplasma phagocytophilum</i> | Zhang et al. (2011) <sup>8</sup>                | China                       | 2004-2006    | D SP                            | PCR, IFA          | 26            | 8               | High                           | High                  |
| <i>Anaplasma phagocytophilum</i> | Zhang et al. (2013) <sup>9</sup>                | China                       | 2009-2010    | UN                              | Culture, IFA, PCR | 421           | 46              | Low                            | Low                   |
| <i>Babesia microti</i>           | Zhou et al. (2013) <sup>10</sup>                | China                       | 2012-2013    | UN                              | PCR               | 449           | 10              | Low                            | Low                   |
| <i>Bartonella</i> spp.           | Chaudhry et al. (2018) <sup>11</sup>            | India                       | 2012-2016    | UN                              | PCR               | 28            | 2               | Medium                         | High                  |
| <i>Bartonella</i> spp.           | Faruque et al. (2017) <sup>12</sup>             | Thailand                    | 2008-2009    | UN                              | Culture           | 720           | 1               | Medium                         | Low                   |
| <i>Bartonella</i> spp.           | Hercik et al. (2017) <sup>13</sup>              | United Republic of Tanzania | 2014-2015    | UN                              | PCR               | 842           | 4               | Low                            | Low                   |
| <i>Bartonella</i> spp.           | Kosoy et al. (2010) <sup>14</sup>               | Thailand                    | 2002-2003    | UN                              | Culture, PCR      | 261           | 14              | Low                            | Medium                |
| <i>Bartonella</i> spp.           | Simpson et al. (2018) <sup>15</sup>             | South Africa                | 2012-2013    | UN                              | PCR               | 74            | 7               | Medium                         | High                  |
| <i>Bartonella</i> spp.           | Sokhna et al. (2013) <sup>16</sup>              | Senegal                     | 2011-2012    | UN                              | PCR               | 440           | 23              | Low                            | Low                   |
| <i>Borrelia</i> spp.             | Aarsland et al. (2012) <sup>17</sup>            | Ethiopia                    | 2009-2010    | UN                              | PCR               | 102           | 2               | Low                            | High                  |
| <i>Borrelia</i> spp.             | Elhelw et al. (2014) <sup>18</sup>              | Egypt                       | 2008-2009    | UN                              | PCR               | 15            | 4               | Medium                         | High                  |
| <i>Borrelia</i> spp.             | Fotso Fotso et al. (2015) <sup>19</sup>         | Algeria                     | 2012-2012    | UN                              | PCR               | 257           | 4               | Low                            | Medium                |
| <i>Borrelia</i> spp.             | Mediannikov et al. (2014) <sup>20</sup>         | Senegal                     | 2010-2011    | UN                              | PCR               | 1566          | 115             | Low                            | Low                   |
| <i>Borrelia</i> spp.             | Nordstrand et al. (2007) <sup>21</sup>          | Togo                        | 2002-2004    | UN                              | PCR               | 237           | 21              | Low                            | Medium                |
| <i>Borrelia</i> spp.             | Parola et al. (2011) <sup>22</sup>              | Senegal                     | 2008-2009    | UN                              | PCR               | 206           | 27              | Medium                         | Medium                |

| Pathogen             | First author, year of publication and reference | Country                     | Study Period | Study Population Classification | Diagnostics Used        | Number Tested | Number Positive | Representativeness Bias Coding | Precision Bias Coding |
|----------------------|-------------------------------------------------|-----------------------------|--------------|---------------------------------|-------------------------|---------------|-----------------|--------------------------------|-----------------------|
| <i>Borrelia</i> spp. | Reller et al. (2011) <sup>23</sup>              | United Republic of Tanzania | NA-NA        | UN                              | PCR                     | 310           | 13              | Low                            | Medium                |
| <i>Borrelia</i> spp. | Sarih et al. (2009) <sup>24</sup>               | Morocco                     | 2005-2006    | UN                              | PCR                     | 127           | 23              | Medium                         | High                  |
| <i>Borrelia</i> spp. | Sokhna et al. (2013) <sup>16</sup>              | Senegal                     | 2011-2012    | UN                              | PCR                     | 440           | 35              | Low                            | Low                   |
| <i>Borrelia</i> spp. | Toure et al. (2017) <sup>25</sup>               | Mali                        | 2012-2012    | UN                              | PCR                     | 8             | 3               | Medium                         | High                  |
| <i>Brucella</i> spp. | Afifi et al. (2005) <sup>26</sup>               | Egypt                       | 1999-2003    | D SP                            | Culture                 | 9883          | 275             | High                           | Low                   |
| <i>Brucella</i> spp. | Barua et al. (2016) <sup>27</sup>               | India                       | 2010-2012    | D SP                            | Culture                 | 102           | 18              | High                           | High                  |
| <i>Brucella</i> spp. | Boone et al. (2017) <sup>28</sup>               | Madagascar                  | 2011-2013    | UN                              | PCR                     | 1020          | 15              | Low                            | Low                   |
| <i>Brucella</i> spp. | Bouley et al. (2012) <sup>29</sup>              | United Republic of Tanzania | 2007-2008    | UN                              | MAT                     | 455           | 16              | Low                            | Low                   |
| <i>Brucella</i> spp. | Carugati et al. (2018) <sup>30</sup>            | United Republic of Tanzania | 2007-2014    | UN                              | MAT                     | 1680          | 45              | Low                            | Low                   |
| <i>Brucella</i> spp. | Cash-Goldwasser et al. (2018) <sup>31</sup>     | United Republic of Tanzania | 2012-2014    | UN                              | Microagglutination test | 562           | 39              | Low                            | Low                   |
| <i>Brucella</i> spp. | Ciftdogan et al. (2011) <sup>32</sup>           | Turkey                      | 2003-2008    | UN                              | Culture                 | 92            | 3               | Low                            | High                  |
| <i>Brucella</i> spp. | Crump et al. (2013) <sup>33</sup>               | United Republic of Tanzania | 2007-2008    | UN                              | MAT                     | 453           | 16              | Low                            | Low                   |
| <i>Brucella</i> spp. | Fadeel et al. (2006) <sup>34</sup>              | Egypt                       | 1999-2003    | UN                              | Culture                 | 1177          | 202             | Low                            | Low                   |
| <i>Brucella</i> spp. | Jennings et al. (2007) <sup>35</sup>            | Egypt                       | 2002-2003    | UN                              | Culture                 | 4490          | 115             | Medium                         | Low                   |
| <i>Brucella</i> spp. | Kamal et al. (2013) <sup>36</sup>               | Saudi Arabia                | 2009-2011    | UN                              | PCR                     | 101           | 50              | Low                            | High                  |
| <i>Brucella</i> spp. | Kuila et al. (2017) <sup>37</sup>               | India                       | 2013-2015    | UN                              | PCR                     | 2088          | 88              | Low                            | Low                   |
| <i>Brucella</i> spp. | Manock et al. (2009) <sup>38</sup>              | Ecuador                     | 2001-2004    | UN                              | ELISA                   | 275           | 4               | Medium                         | Medium                |
| <i>Brucella</i> spp. | Mattar et al. (2017) <sup>39</sup>              | Colombia                    | 2012-2013    | UN                              | Rose Bengal plate test  | 100           | 1               | Medium                         | High                  |
| <i>Brucella</i> spp. | Migisha et al. (2018) <sup>40</sup>             | Uganda                      | 2017-2017    | D SP                            | Culture                 | 235           | 10              | High                           | Medium                |
| <i>Brucella</i> spp. | Nandagopal et al. (2012) <sup>41</sup>          | India                       | 2008-2009    | UN                              | PCR                     | 301           | 3               | Low                            | Medium                |
| <i>Brucella</i> spp. | Paul et al. (2017) <sup>42</sup>                | Saudi Arabia                | 2014-2016    | UN                              | Culture                 | 377           | 37              | Low                            | Medium                |
| <i>Brucella</i> spp. | Rahman et al. (2016) <sup>43</sup>              | Bangladesh                  | 2007-2008    | D SP                            | PCR                     | 6             | 3               | High                           | High                  |

| Pathogen                               | First author, year of publication and reference | Country                     | Study Period | Study Population Classification | Diagnostics Used           | Number Tested | Number Positive | Representativeness Bias Coding | Precision Bias Coding |
|----------------------------------------|-------------------------------------------------|-----------------------------|--------------|---------------------------------|----------------------------|---------------|-----------------|--------------------------------|-----------------------|
| <i>Campylobacter</i> spp.              | Ali et al. (2016) <sup>44</sup>                 | Pakistan                    | 2011-2014    | D RESP                          | Culture                    | 356           | 2               | High                           | Medium                |
| <i>Campylobacter</i> spp.              | Bottieau et al. (2011) <sup>45</sup>            | No Specific Country         | 2000-2006    | D GI                            | Stool examination, Culture | 512           | 47              | High                           | Low                   |
| <i>Campylobacter</i> spp.              | Hogan et al. (2018) <sup>46</sup>               | Ghana                       | 2013-2015    | UN                              | PCR                        | 240           | 21              | Low                            | Medium                |
| <i>Campylobacter</i> spp.              | Naheed et al. (2008) <sup>47</sup>              | Bangladesh                  | 2003-2004    | UN                              | Culture                    | 867           | 1               | Low                            | Low                   |
| <i>Coxiella burnetii</i>               | Angelakis et al. (2014) <sup>48</sup>           | No Specific Country         | 2008-2012    | UN                              | PCR                        | 1888          | 7               | Low                            | Low                   |
| <i>Coxiella burnetii</i>               | Crump et al. (2013) <sup>33</sup>               | United Republic of Tanzania | 2007-2008    | UN                              | IFA                        | 482           | 24              | Low                            | Low                   |
| <i>Coxiella burnetii</i>               | Esmacili et al. (2017) <sup>49</sup>            | Iran (Islamic Republic of)  | 2013-2013    | UN                              | ELISA                      | 116           | 16              | Medium                         | High                  |
| <i>Coxiella burnetii</i>               | Greiner et al. (2018) <sup>50</sup>             | Thailand                    | 2002-2005    | UN                              | IFA                        | 1784          | 5               | Medium                         | Low                   |
| <i>Coxiella burnetii</i>               | Hamilton et al. (2011) <sup>51</sup>            | Iraq                        | 2008-2008    | UN                              | PCR, IFA                   | 18            | 8               | Low                            | High                  |
| <i>Coxiella burnetii</i>               | Hercik et al. (2017) <sup>13</sup>              | United Republic of Tanzania | 2014-2015    | UN                              | PCR                        | 842           | 2               | Low                            | Low                   |
| <i>Coxiella burnetii</i>               | Khalili et al. (2016) <sup>52</sup>             | Iran (Islamic Republic of)  | 2014-2015    | UN                              | PCR                        | 92            | 7               | Low                            | High                  |
| <i>Coxiella burnetii</i>               | Manock et al. (2009) <sup>38</sup>              | Ecuador                     | 2001-2004    | UN                              | ELISA                      | 33            | 15              | Medium                         | High                  |
| <i>Coxiella burnetii</i>               | Mazyad et al. (2007) <sup>53</sup>              | Egypt                       | 2006-2006    | UN                              | PCR                        | 150           | 5               | Low                            | Medium                |
| <i>Coxiella burnetii</i>               | Metanat et al. (2014) <sup>54</sup>             | Iran (Islamic Republic of)  | 2011-2011    | UN                              | IFA                        | 105           | 23              | Low                            | High                  |
| <i>Coxiella burnetii</i>               | Njeru et al. (2016) <sup>55</sup>               | Kenya                       | 2014-2015    | UN                              | PCR                        | 448           | 10              | Low                            | Low                   |
| <i>Coxiella burnetii</i>               | Pradeep et al. (2017) <sup>56</sup>             | India                       | 2016-2016    | UN                              | PCR                        | 72            | 2               | Medium                         | High                  |
| <i>Coxiella burnetii</i>               | Ratmanov et al. (2013) <sup>57</sup>            | Senegal                     | 2008-2011    | UN                              | PCR                        | 874           | 4               | Low                            | Low                   |
| <i>Coxiella burnetii</i>               | Reller et al. (2016) <sup>58</sup>              | Nicaragua                   | 2008-2009    | UN                              | IFA                        | 748           | 10              | Low                            | Low                   |
| <i>Coxiella burnetii</i>               | Sokhna et al. (2013) <sup>16</sup>              | Senegal                     | 2011-2012    | UN                              | PCR                        | 440           | 2               | Low                            | Low                   |
| <i>Coxiella burnetii</i>               | Toure et al. (2017) <sup>25</sup>               | Mali                        | 2012-2012    | UN                              | PCR                        | 8             | 1               | Medium                         | High                  |
| Crimean-Congo haemorrhagic fever virus | Alam et al. (2013) <sup>59</sup>                | Pakistan                    | 2008-2008    | D HEM                           | PCR, IgM                   | 44            | 16              | High                           | High                  |

| Pathogen                               | First author, year of publication and reference | Country                          | Study Period | Study Population Classification | Diagnostics Used           | Number Tested | Number Positive | Representativeness Bias Coding | Precision Bias Coding |
|----------------------------------------|-------------------------------------------------|----------------------------------|--------------|---------------------------------|----------------------------|---------------|-----------------|--------------------------------|-----------------------|
| Crimean-Congo haemorrhagic fever virus | Ali et al. (2007) <sup>60</sup>                 | Pakistan                         | 2001-2001    | D HEM                           | PCR                        | 10            | 3               | High                           | High                  |
| Crimean-Congo haemorrhagic fever virus | Bukbuk et al. (2016) <sup>61</sup>              | Nigeria                          | 2010-2014    | D SP                            | PCR                        | 380           | 1               | High                           | Medium                |
| Crimean-Congo haemorrhagic fever virus | Kuchuloria et al. (2016) <sup>62</sup>          | Georgia                          | 2008-2011    | UN                              | IgM                        | 537           | 3               | Medium                         | Low                   |
| Eastern equine encephalitis virus      | Aguilar et al. (2007) <sup>63</sup>             | Peru                             | NA-NA        | D NEU                           | ELISA                      | 153           | 2               | High                           | Medium                |
| <i>Ehrlichia</i> spp.                  | Chikeka et al. (2016) <sup>64</sup>             | Nicaragua                        | NA-NA        | UN                              | IFA                        | 748           | 1               | Low                            | Low                   |
| <i>Ehrlichia</i> spp.                  | Ndip et al. (2009) <sup>65</sup>                | Cameroon                         | 2003-2003    | UN                              | PCR                        | 118           | 12              | Medium                         | High                  |
| Hantavirus                             | Armien et al. (2013) <sup>66</sup>              | Panama                           | 2006-2010    | D SP                            | PCR                        | 150           | 117             | High                           | Medium                |
| Hantavirus                             | Castillo Ore et al. (2012) <sup>67</sup>        | Peru                             | 2007-2010    | UN                              | IgM                        | 5174          | 9               | Low                            | Low                   |
| Hantavirus                             | Chandy et al. (2005) <sup>68</sup>              | India                            | 2002-2003    | D HEM                           | ELISA                      | 152           | 23              | High                           | Medium                |
| Hantavirus                             | Chandy et al. (2009) <sup>69</sup>              | India                            | 2005-2007    | UN                              | ELISA, IFA, PCR            | 347           | 86              | Low                            | Medium                |
| Hantavirus                             | Chau et al. (2017) <sup>70</sup>                | Mozambique                       | 2012-2014    | UN                              | ELISA                      | 200           | 4               | Low                            | Medium                |
| Hantavirus                             | Chen et al. (2014) <sup>71</sup>                | China                            | 2011-2012    | D HEM                           | PCR, IFA                   | 85            | 33              | High                           | High                  |
| Hantavirus                             | Chrispal et al. (2010) <sup>72</sup>            | India                            | 2007-2008    | UN                              | ELISA                      | 398           | 1               | Low                            | Low                   |
| Hantavirus                             | Cruz et al. (2012) <sup>73</sup>                | Bolivia (Plurinational State of) | 2008-2009    | UN                              | PCR, IgM                   | 372           | 9               | Low                            | Medium                |
| Hantavirus                             | Klempa et al. (2010) <sup>74</sup>              | Guinea                           | 2001-2005    | D HEM                           | ELISA, Neutralization test | 717           | 8               | High                           | Low                   |
| Hantavirus                             | Kuchuloria et al. (2014) <sup>75</sup>          | Georgia                          | 2008-2011    | UN                              | IgM                        | 537           | 2               | Low                            | Low                   |
| Hantavirus                             | Liu et al. (2007) <sup>76</sup>                 | China                            | 2002-2004    | UN                              | IFA, PCR                   | 130           | 49              | Low                            | High                  |
| Hantavirus                             | Mattar et al. (2017) <sup>39</sup>              | Colombia                         | 2012-2013    | UN                              | ELISA                      | 100           | 4               | Medium                         | High                  |
| Hantavirus                             | Suharti et al. (2009) <sup>77</sup>             | Indonesia                        | 1995-1996    | D SP                            | ELISA                      | 60            | 5               | High                           | High                  |
| Hantavirus                             | Thompson et al. (2015) <sup>78</sup>            | Nepal                            | 2008-2011    | UN                              | IgM                        | 125           | 2               | Low                            | High                  |
| Hantavirus                             | Zhan et al. (2017) <sup>79</sup>                | China                            | 2011-2011    | D SP                            | IgM, PCR                   | 141           | 2               | High                           | Medium                |



| Pathogen                    | First author, year of publication and reference | Country          | Study Period | Study Population Classification | Diagnostics Used       | Number Tested | Number Positive | Representativeness Bias Coding | Precision Bias Coding |
|-----------------------------|-------------------------------------------------|------------------|--------------|---------------------------------|------------------------|---------------|-----------------|--------------------------------|-----------------------|
| Japanese encephalitis virus | Anga et al. (2010) <sup>80</sup>                | Papua New Guinea | 2007-2008    | D NEU                           | IgM                    | 129           | 2               | High                           | High                  |
| Japanese encephalitis virus | Chatterjee et al. (2004) <sup>81</sup>          | India            | 1996-1999    | D NEU                           | HI                     | 72            | 24              | High                           | High                  |
| Japanese encephalitis virus | Chheng et al. (2013) <sup>82</sup>              | Cambodia         | 2009-2010    | UN                              | ELISA                  | 107           | 6               | Low                            | High                  |
| Japanese encephalitis virus | Dias et al. (2018) <sup>83</sup>                | India            | 2014-2014    | UN                              | RNA sequencing         | 4             | 1               | Low                            | High                  |
| Japanese encephalitis virus | Ellis et al. (2006) <sup>84</sup>               | Thailand         | 1999-2002    | UN                              | ELISA                  | 530           | 1               | Low                            | Low                   |
| Japanese encephalitis virus | Joshi et al. (2013) <sup>85</sup>               | India            | 2007-2007    | D NEU                           | ELISA                  | 152           | 4               | High                           | Medium                |
| Japanese encephalitis virus | Kakoti et al. (2013) <sup>86</sup>              | India            | 2012-2012    | D HEM                           | IgM                    | 223           | 49              | High                           | Medium                |
| Japanese encephalitis virus | Kumar et al. (2015) <sup>87</sup>               | India            | NA-NA        | D NEU                           | IgM                    | 108           | 54              | High                           | High                  |
| Japanese encephalitis virus | Maude et al. (2016) <sup>88</sup>               | Bangladesh       | 2012-2012    | UN                              | IgM                    | 300           | 1               | Medium                         | Medium                |
| Japanese encephalitis virus | Medhi et al. (2017) <sup>89</sup>               | India            | 2012-2014    | D NEU                           | ELISA                  | 1707          | 601             | High                           | Low                   |
| Japanese encephalitis virus | Rasul et al. (2012) <sup>90</sup>               | Bangladesh       | 2007-2009    | D NEU                           | ELISA                  | 130           | 2               | High                           | High                  |
| Japanese encephalitis virus | Rauf et al. (2018) <sup>91</sup>                | India            | 2014-2014    | D NEU                           | IgM, PCR               | 54            | 8               | High                           | High                  |
| Japanese encephalitis virus | Rayamajhi et al. (2006) <sup>92</sup>           | Nepal            | 2000-2001    | D NEU                           | IgM                    | 117           | 54              | High                           | High                  |
| Japanese encephalitis virus | Rayamajhi et al. (2007) <sup>93</sup>           | Nepal            | 2000-2001    | D NEU                           | IgM                    | 94            | 54              | High                           | High                  |
| Japanese encephalitis virus | Rayamajhi et al. (2011) <sup>94</sup>           | Nepal            | 2006-2008    | D NEU                           | IgM                    | 86            | 9               | High                           | High                  |
| Japanese encephalitis virus | Sarkar et al. (2012) <sup>95</sup>              | India            | 2010-2010    | D NEU                           | IgM                    | 43            | 23              | High                           | High                  |
| Japanese encephalitis virus | Singh et al. (2009) <sup>96</sup>               | Nepal            | 2003-2004    | D NEU                           | IgM                    | 107           | 19              | High                           | High                  |
| Japanese encephalitis virus | Singh et al. (2014) <sup>97</sup>               | India            | 2008-2011    | D NEU                           | PCR                    | 1410          | 10              | High                           | Low                   |
| Japanese encephalitis virus | Swami et al. (2008) <sup>98</sup>               | India            | 2003-2005    | D NEU                           | IgM, PCR               | 40            | 9               | High                           | High                  |
| Japanese encephalitis virus | Taraphdar et al. (2012) <sup>99</sup>           | India            | 2010-2010    | UN                              | PCR                    | 58            | 23              | Low                            | High                  |
| Lassa virus                 | Akhuemokhan et al. (2017) <sup>100</sup>        | Nigeria          | 2009-2010    | UN                              | PCR                    | 243           | 13              | Low                            | Medium                |
| Lassa virus                 | Boisen et al. (2015) <sup>101</sup>             | Sierra Leone     | 2012-2012    | D SP                            | PCR, Antigen detection | 53            | 29              | High                           | High                  |

| Pathogen                   | First author, year of publication and reference | Country                          | Study Period | Study Population Classification | Diagnostics Used        | Number Tested | Number Positive | Representativeness Bias Coding | Precision Bias Coding |
|----------------------------|-------------------------------------------------|----------------------------------|--------------|---------------------------------|-------------------------|---------------|-----------------|--------------------------------|-----------------------|
| Lassa virus                | Ehichioya et al. (2012) <sup>102</sup>          | Nigeria                          | 2005-2008    | D SP                            | PCR                     | 451           | 2               | High                           | Low                   |
| Lassa virus                | Schoepp et al. (2014) <sup>103</sup>            | Sierra Leone                     | 2006-2008    | D SP                            | ELISA                   | 253           | 7               | High                           | Medium                |
| Lassa virus                | Shehu et al. (2018) <sup>104</sup>              | Nigeria                          | 2016-2016    | D SP                            | PCR                     | 34            | 11              | High                           | High                  |
| Lassa virus                | Stremlau et al. (2015) <sup>105</sup>           | Nigeria                          | NA-NA        | D HEM                           | Sequencing              | 195           | 104             | High                           | Medium                |
| <i>Leishmania donovani</i> | Hailu et al. (2006) <sup>106</sup>              | Ethiopia                         | NA-NA        | D SP                            | Microscopy, Culture     | 103           | 49              | High                           | High                  |
| <i>Leishmania donovani</i> | Joshi et al. (2006) <sup>107</sup>              | Nepal                            | 1998-2002    | D SP                            | Bone marrow examination | 996           | 284             | High                           | Low                   |
| <i>Leishmania donovani</i> | Mukhtar et al. (2015) <sup>108</sup>            | Sudan                            | 2012-2014    | D SP                            | Culture                 | 285           | 191             | High                           | Medium                |
| <i>Leishmania donovani</i> | Rijal et al. (2004) <sup>109</sup>              | Nepal                            | 2000-2002    | D SP                            | Microscopy              | 261           | 155             | High                           | Medium                |
| <i>Leptospira</i> spp.     | Albuquerque Filho et al. (2011) <sup>110</sup>  | Brazil                           | 2009-2009    | UN                              | Culture                 | 97            | 56              | Low                            | High                  |
| <i>Leptospira</i> spp.     | Alia et al. (2019) <sup>111</sup>               | Malaysia                         | 2016-2017    | D SP                            | PCR                     | 50            | 13              | High                           | High                  |
| <i>Leptospira</i> spp.     | Barragan et al. (2016) <sup>112</sup>           | Ecuador                          | 2013-2015    | UN                              | PCR                     | 668           | 100             | Low                            | Low                   |
| <i>Leptospira</i> spp.     | Biggs et al. (2011) <sup>113</sup>              | United Republic of Tanzania      | 2007-2008    | UN                              | MAT                     | 831           | 70              | Low                            | Low                   |
| <i>Leptospira</i> spp.     | Blacksell et al. (2006) <sup>114</sup>          | Lao People's Democratic Republic | 2001-2003    | UN                              | MAT                     | 186           | 5               | Medium                         | Medium                |
| <i>Leptospira</i> spp.     | Boonsilp et al. (2011) <sup>115</sup>           | Thailand                         | 2001-2002    | UN                              | Culture, PCR            | 418           | 120             | Medium                         | Low                   |
| <i>Leptospira</i> spp.     | Chansamouth et al. (2016) <sup>116</sup>        | Lao People's Democratic Republic | 2006-2010    | UN                              | MAT                     | 158           | 1               | Medium                         | Medium                |
| <i>Leptospira</i> spp.     | Chheng et al. (2013) <sup>82</sup>              | Cambodia                         | 2009-2010    | UN                              | Culture, PCR            | 1179          | 17              | Low                            | Low                   |
| <i>Leptospira</i> spp.     | Chiriboga et al. (2015) <sup>117</sup>          | Ecuador                          | 2011-2012    | UN                              | PCR                     | 210           | 132             | Low                            | Medium                |
| <i>Leptospira</i> spp.     | Cohen et al. (2007) <sup>118</sup>              | Thailand                         | 2002-2003    | UN                              | MAT                     | 704           | 67              | Low                            | Low                   |
| <i>Leptospira</i> spp.     | Crump et al. (2013) <sup>33</sup>               | United Republic of Tanzania      | 2007-2008    | UN                              | MAT                     | 453           | 40              | Low                            | Low                   |
| <i>Leptospira</i> spp.     | Dassanayake et al. (2009) <sup>119</sup>        | Sri Lanka                        | 2007-2008    | UN                              | MAT                     | 123           | 62              | Low                            | High                  |
| <i>Leptospira</i> spp.     | Dittrich et al. (2018) <sup>120</sup>           | Lao People's Democratic Republic | 2014-2015    | D SP                            | MAT                     | 248           | 12              | High                           | Medium                |

| Pathogen               | First author, year of publication and reference | Country                          | Study Period | Study Population Classification | Diagnostics Used  | Number Tested | Number Positive | Representativeness Bias Coding | Precision Bias Coding |
|------------------------|-------------------------------------------------|----------------------------------|--------------|---------------------------------|-------------------|---------------|-----------------|--------------------------------|-----------------------|
| <i>Leptospira</i> spp. | Ellis et al. (2006) <sup>84</sup>               | Thailand                         | 1999-2002    | UN                              | IgM, MAT          | 613           | 107             | Low                            | Low                   |
| <i>Leptospira</i> spp. | Faruque et al. (2017) <sup>12</sup>             | Thailand                         | 2008-2009    | UN                              | Culture           | 720           | 1               | Medium                         | Low                   |
| <i>Leptospira</i> spp. | Gasem et al. (2009) <sup>121</sup>              | Indonesia                        | 2005-2006    | UN                              | PCR               | 137           | 4               | Low                            | High                  |
| <i>Leptospira</i> spp. | Guillebaud et al. (2018) <sup>122</sup>         | Madagascar                       | 2014-2015    | UN                              | PCR               | 682           | 1               | Low                            | Low                   |
| <i>Leptospira</i> spp. | Hem et al. (2016) <sup>123</sup>                | Cambodia                         | 2007-2009    | UN                              | MAT               | 2044          | 17              | Low                            | Low                   |
| <i>Leptospira</i> spp. | Hercik et al. (2017) <sup>13</sup>              | United Republic of Tanzania      | 2014-2015    | UN                              | PCR               | 842           | 22              | Low                            | Low                   |
| <i>Leptospira</i> spp. | Hercik et al. (2018) <sup>124</sup>             | United Republic of Tanzania      | 2014-2014    | UN                              | PCR               | 191           | 3               | Low                            | Medium                |
| <i>Leptospira</i> spp. | Ismail et al. (2006) <sup>125</sup>             | Egypt                            | 1999-2003    | UN                              | MAT               | 886           | 141             | Low                            | Low                   |
| <i>Leptospira</i> spp. | Kendall et al. (2010) <sup>126</sup>            | Bangladesh                       | 2001-2001    | UN                              | MAT               | 78            | 7               | Low                            | High                  |
| <i>Leptospira</i> spp. | Koizumi et al. (2009) <sup>127</sup>            | Sri Lanka                        | 2008-2008    | D SP                            | PCR               | 107           | 3               | High                           | High                  |
| <i>Leptospira</i> spp. | LaRocque et al. (2005) <sup>128</sup>           | Bangladesh                       | 2001-2001    | D SP                            | PCR               | 359           | 63              | High                           | Medium                |
| <i>Leptospira</i> spp. | Libraty et al. (2007) <sup>129</sup>            | Thailand                         | 1994-1999    | UN                              | MAT               | 812           | 14              | Low                            | Low                   |
| <i>Leptospira</i> spp. | Mattar et al. (2017) <sup>39</sup>              | Colombia                         | 2012-2013    | UN                              | ELISA, MAT        | 100           | 27              | Medium                         | High                  |
| <i>Leptospira</i> spp. | Matthias et al. (2008) <sup>130</sup>           | Peru                             | 2003-2006    | UN                              | Culture           | 881           | 45              | Medium                         | Low                   |
| <i>Leptospira</i> spp. | Mayxay et al. (2013) <sup>131</sup>             | Lao People's Democratic Republic | 2008-2010    | UN                              | Culture, MAT, PCR | 1932          | 137             | Low                            | Low                   |
| <i>Leptospira</i> spp. | Maze et al. (2016) <sup>132</sup>               | United Republic of Tanzania      | 2012-2014    | UN                              | MAT               | 1017          | 19              | Low                            | Low                   |
| <i>Leptospira</i> spp. | McGready et al. (2010) <sup>133</sup>           | Thailand                         | 2004-2006    | UN                              | Culture, MAT      | 203           | 5               | Medium                         | Medium                |
| <i>Leptospira</i> spp. | Mueller et al. (2014) <sup>134</sup>            | Cambodia                         | 2008-2010    | UN                              | PCR               | 1193          | 112             | Low                            | Low                   |
| <i>Leptospira</i> spp. | Murdoch et al. (2004) <sup>135</sup>            | Nepal                            | 2001-2001    | UN                              | PCR               | 26            | 11              | Low                            | High                  |
| <i>Leptospira</i> spp. | Murray et al. (2011) <sup>136</sup>             | Egypt                            | 2005-2007    | UN                              | Culture           | 2441          | 47              | Low                            | Low                   |
| <i>Leptospira</i> spp. | Natarajaseenivasan et al. (2004) <sup>137</sup> | India                            | 2000-2000    | D SP                            | MAT, Culture      | 29            | 7               | High                           | High                  |

| Pathogen                      | First author, year of publication and reference | Country                          | Study Period | Study Population Classification | Diagnostics Used  | Number Tested | Number Positive | Representativeness Bias Coding | Precision Bias Coding |
|-------------------------------|-------------------------------------------------|----------------------------------|--------------|---------------------------------|-------------------|---------------|-----------------|--------------------------------|-----------------------|
| <i>Leptospira</i> spp.        | Natarajaseenivasan et al. (2012) <sup>138</sup> | India                            | 2009-2009    | D SP                            | PCR               | 75            | 71              | High                           | High                  |
| <i>Leptospira</i> spp.        | Phimda et al. (2007) <sup>139</sup>             | Thailand                         | 2003-2005    | D SP                            | Culture, MAT      | 296           | 55              | High                           | Medium                |
| <i>Leptospira</i> spp.        | Rafizah et al. (2013) <sup>140</sup>            | Malaysia                         | NA-NA        | UN                              | MAT               | 999           | 53              | Medium                         | Low                   |
| <i>Leptospira</i> spp.        | Rao et al. (2005) <sup>141</sup>                | India                            | NA-NA        | D SP                            | ELISA             | 70            | 2               | High                           | High                  |
| <i>Leptospira</i> spp.        | Ravindar et al. (2018) <sup>142</sup>           | India                            | 2016-2017    | UN                              | PCR               | 100           | 13              | Low                            | High                  |
| <i>Leptospira</i> spp.        | Reller et al. (2014) <sup>143</sup>             | Nicaragua                        | 2008-2009    | UN                              | PCR               | 748           | 17              | Low                            | Low                   |
| <i>Leptospira</i> spp.        | Ribeiro et al. (2017) <sup>144</sup>            | Mozambique                       | 2012-2015    | UN                              | ELISA, MAT        | 373           | 3               | Low                            | Medium                |
| <i>Leptospira</i> spp.        | Ricapa-Antay et al. (2018) <sup>145</sup>       | Peru                             | 2016-2016    | UN                              | PCR               | 139           | 16              | Medium                         | Medium                |
| <i>Leptospira</i> spp.        | Rubbo et al. (2018) <sup>146</sup>              | Central African Republic         | 2012-2015    | UN                              | MAT               | 32            | 2               | Medium                         | High                  |
| <i>Leptospira</i> spp.        | Sengupta et al. (2017) <sup>147</sup>           | India                            | 2012-2014    | UN                              | PCR               | 150           | 5               | Medium                         | Medium                |
| <i>Leptospira</i> spp.        | Suttinont et al. (2006) <sup>148</sup>          | Thailand                         | 2001-2002    | UN                              | Culture, MAT, IFA | 845           | 293             | Medium                         | Low                   |
| <i>Leptospira</i> spp.        | Thipmontree et al. (2014) <sup>149</sup>        | Thailand                         | 2001-2012    | UN                              | Culture, IFA, PCR | 726           | 118             | Medium                         | Low                   |
| <i>Leptospira</i> spp.        | Waggoner et al. (2017) <sup>150</sup>           | Kenya                            | 2014-2015    | UN                              | PCR               | 385           | 1               | Low                            | Low                   |
| <i>Leptospira</i> spp.        | Wuthiekanun et al. (2007) <sup>151</sup>        | Thailand                         | 2001-2002    | UN                              | Culture           | 989           | 83              | Low                            | Low                   |
| <i>Leptospira</i> spp.        | Zida et al. (2018) <sup>152</sup>               | Burkina Faso                     | 2014-2015    | UN                              | PCR               | 781           | 1               | Low                            | Low                   |
| <i>Listeria</i> spp.          | El-Mahallawy et al. (2005) <sup>153</sup>       | Egypt                            | 1999-1999    | D COMORBID                      | Culture           | 1135          | 1               | High                           | Low                   |
| Nipah virus                   | Chadha et al. (2006) <sup>154</sup>             | India                            | 2001-2001    | D NEU                           | PCR               | 6             | 5               | High                           | High                  |
| <i>Orientia tsutsugamushi</i> | Blacksell et al. (2007) <sup>155</sup>          | Nepal                            | 2002-2004    | UN                              | IFA               | 103           | 5               | Low                            | High                  |
| <i>Orientia tsutsugamushi</i> | Blacksell et al. (2010) <sup>156</sup>          | Lao People's Democratic Republic | 2003-2007    | D SP                            | IFA               | 1030          | 101             | High                           | Low                   |
| <i>Orientia tsutsugamushi</i> | Blacksell et al. (2016) <sup>157</sup>          | Thailand                         | 2006-2007    | UN                              | IFA, PCR, Culture | 152           | 37              | Medium                         | Medium                |
| <i>Orientia tsutsugamushi</i> | Blacksell et al. (2016) <sup>158</sup>          | Thailand                         | 2007-2008    | UN                              | PCR, Culture      | 135           | 22              | Medium                         | High                  |
| <i>Orientia tsutsugamushi</i> | Chansamouth et al. (2016) <sup>116</sup>        | Lao People's Democratic Republic | 2006-2010    | UN                              | IFA, Culture, PCR | 217           | 16              | Medium                         | Medium                |

| Pathogen                      | First author, year of publication and reference | Country                               | Study Period | Study Population Classification | Diagnostics Used  | Number Tested | Number Positive | Representativeness Bias Coding | Precision Bias Coding |
|-------------------------------|-------------------------------------------------|---------------------------------------|--------------|---------------------------------|-------------------|---------------|-----------------|--------------------------------|-----------------------|
| <i>Orientia tsutsugamushi</i> | Chen et al. (2014) <sup>71</sup>                | China                                 | 2011-2012    | D HEM                           | PCR               | 85            | 1               | High                           | High                  |
| <i>Orientia tsutsugamushi</i> | Chheng et al. (2013) <sup>82</sup>              | Cambodia                              | 2009-2010    | UN                              | PCR, IFA          | 1179          | 17              | Low                            | Low                   |
| <i>Orientia tsutsugamushi</i> | Jung et al. (2015) <sup>159</sup>               | Democratic People's Republic of Korea | 2009-2013    | UN                              | IFA               | 382           | 3               | Low                            | Medium                |
| <i>Orientia tsutsugamushi</i> | Kingston et al. (2018) <sup>160</sup>           | Bangladesh                            | 2014-2015    | UN                              | PCR               | 416           | 45              | Low                            | Low                   |
| <i>Orientia tsutsugamushi</i> | Kocher et al. (2017) <sup>161</sup>             | Peru                                  | 2013-2013    | UN                              | ELISA             | 1124          | 1               | Low                            | Low                   |
| <i>Orientia tsutsugamushi</i> | Kumar et al. (2014) <sup>162</sup>              | India                                 | 2011-2012    | UN                              | PCR               | 199           | 48              | Low                            | Medium                |
| <i>Orientia tsutsugamushi</i> | Liu et al. (2007) <sup>76</sup>                 | China                                 | 2002-2004    | UN                              | IFA, PCR          | 130           | 46              | Low                            | High                  |
| <i>Orientia tsutsugamushi</i> | Maude et al. (2015) <sup>163</sup>              | Bangladesh                            | 2012-2012    | UN                              | PCR               | 300           | 1               | Low                            | Medium                |
| <i>Orientia tsutsugamushi</i> | Mayxay et al. (2013) <sup>131</sup>             | Lao People's Democratic Republic      | 2008-2010    | UN                              | Culture, PCR      | 1871          | 170             | Low                            | Low                   |
| <i>Orientia tsutsugamushi</i> | McGready et al. (2010) <sup>133</sup>           | Thailand                              | 2004-2006    | UN                              | Culture, PCR, IFA | 203           | 11              | Medium                         | Medium                |
| <i>Orientia tsutsugamushi</i> | Mueller et al. (2014) <sup>134</sup>            | Cambodia                              | 2008-2010    | UN                              | PCR               | 1193          | 47              | Low                            | Low                   |
| <i>Orientia tsutsugamushi</i> | Paris et al. (2011) <sup>164</sup>              | Thailand                              | 2007-2008    | UN                              | IFA, Culture, PCR | 138           | 26              | Medium                         | High                  |
| <i>Orientia tsutsugamushi</i> | Phimda et al. (2007) <sup>139</sup>             | Thailand                              | 2003-2005    | D SP                            | IFA               | 230           | 34              | High                           | Medium                |
| <i>Orientia tsutsugamushi</i> | Reller et al. (2012) <sup>165</sup>             | Sri Lanka                             | 2007-2007    | UN                              | ELISA             | 883           | 17              | Low                            | Low                   |
| <i>Orientia tsutsugamushi</i> | Saisongkorh et al. (2004) <sup>166</sup>        | Thailand                              | NA-NA        | UN                              | PCR               | 36            | 9               | Medium                         | High                  |
| <i>Orientia tsutsugamushi</i> | Sonthayanon et al. (2006) <sup>167</sup>        | Thailand                              | 2000-2001    | UN                              | IFA               | 722           | 183             | Low                            | Low                   |
| <i>Orientia tsutsugamushi</i> | Srinivasan et al. (2017) <sup>168</sup>         | India                                 | 2014-2015    | D SP                            | PCR               | 68            | 6               | High                           | High                  |
| <i>Orientia tsutsugamushi</i> | Thipmontree et al. (2016) <sup>169</sup>        | Thailand                              | 2011-2012    | UN                              | IFA               | 495           | 98              | Low                            | Low                   |
| <i>Orientia tsutsugamushi</i> | Tshokey et al. (2018) <sup>170</sup>            | Bhutan                                | 2014-2015    | UN                              | PCR               | 1044          | 7               | Medium                         | Low                   |
| <i>Pasteurella</i> spp.       | Bengre et al. (2012) <sup>171</sup>             | India                                 | 2009-2011    | D COMORBID                      | Culture           | 50            | 1               | High                           | High                  |
| <i>Pasteurella</i> spp.       | El-Mahallawy et al. (2005) <sup>153</sup>       | Egypt                                 | 1999-1999    | D COMORBID                      | Culture           | 1135          | 6               | High                           | Low                   |

| Pathogen                 | First author, year of publication and reference | Country                          | Study Period | Study Population Classification | Diagnostics Used | Number Tested | Number Positive | Representativeness Bias Coding | Precision Bias Coding |
|--------------------------|-------------------------------------------------|----------------------------------|--------------|---------------------------------|------------------|---------------|-----------------|--------------------------------|-----------------------|
| <i>Rickettsia</i> (SFGR) | Aarsland et al. (2012) <sup>17</sup>            | Ethiopia                         | 2009-2010    | UN                              | PCR              | 102           | 4               | Low                            | High                  |
| <i>Rickettsia</i> (SFGR) | Bouchaib et al. (2018) <sup>172</sup>           | Algeria                          | 2013-2015    | UN                              | PCR              | 166           | 57              | Low                            | Medium                |
| <i>Rickettsia</i> (SFGR) | Chowdhury et al. (2017) <sup>173</sup>          | Bangladesh                       | 2015-2016    | D SP                            | PCR              | 414           | 81              | High                           | Low                   |
| <i>Rickettsia</i> (SFGR) | Crump et al. (2013) <sup>33</sup>               | United Republic of Tanzania      | 2007-2008    | UN                              | IFA              | 450           | 36              | Low                            | Low                   |
| <i>Rickettsia</i> (SFGR) | dos Santos et al. (2012) <sup>174</sup>         | Brazil                           | 2009-2010    | D HEM                           | PCR              | 110           | 36              | High                           | High                  |
| <i>Rickettsia</i> (SFGR) | Eremeeva et al. (2013) <sup>175</sup>           | Guatemala                        | 2007-2007    | UN                              | PCR, IFA         | 17            | 1               | High                           | High                  |
| <i>Rickettsia</i> (SFGR) | Faruque et al. (2017) <sup>12</sup>             | Thailand                         | 2008-2009    | UN                              | PCR              | 360           | 1               | Medium                         | Medium                |
| <i>Rickettsia</i> (SFGR) | Gaowa et al. (2018) <sup>176</sup>              | China                            | 2015-2016    | UN                              | PCR              | 261           | 6               | Medium                         | Medium                |
| <i>Rickettsia</i> (SFGR) | Hidalgo et al. (2013) <sup>177</sup>            | Colombia                         | 2010-2011    | D SP                            | IFA              | 26            | 7               | High                           | High                  |
| <i>Rickettsia</i> (SFGR) | Kingston et al. (2018) <sup>160</sup>           | Bangladesh                       | 2014-2015    | UN                              | PCR              | 416           | 2               | Low                            | Low                   |
| <i>Rickettsia</i> (SFGR) | Kuloglu et al. (2012) <sup>178</sup>            | Turkey                           | 2003-2009    | D SP                            | PCR, IFA         | 126           | 97              | High                           | High                  |
| <i>Rickettsia</i> (SFGR) | Liu et al. (2016) <sup>179</sup>                | China                            | 2014-2014    | D SP                            | PCR              | 733           | 56              | High                           | Low                   |
| <i>Rickettsia</i> (SFGR) | Maina et al. (2012) <sup>180</sup>              | Kenya                            | 2008-2010    | UN                              | PCR              | 699           | 50              | Low                            | Low                   |
| <i>Rickettsia</i> (SFGR) | Manock et al. (2009) <sup>38</sup>              | Ecuador                          | 2001-2004    | UN                              | ELISA            | 214           | 6               | Medium                         | Medium                |
| <i>Rickettsia</i> (SFGR) | Mattar et al. (2017) <sup>39</sup>              | Colombia                         | 2012-2013    | UN                              | IFI              | 100           | 2               | Medium                         | High                  |
| <i>Rickettsia</i> (SFGR) | Mayxay et al. (2013) <sup>131</sup>             | Lao People's Democratic Republic | 2008-2010    | UN                              | PCR              | 1849          | 2               | Low                            | Low                   |
| <i>Rickettsia</i> (SFGR) | Mediannikov et al. (2010) <sup>181</sup>        | Senegal                          | 2008-2009    | UN                              | PCR              | 204           | 8               | Medium                         | Medium                |
| <i>Rickettsia</i> (SFGR) | Mediannikov et al. (2013) <sup>182</sup>        | No Specific Country              | 2010-2012    | UN                              | PCR              | 2612          | 321             | Low                            | Low                   |
| <i>Rickettsia</i> (SFGR) | Mongkol et al. (2018) <sup>183</sup>            | Thailand                         | 2012-2014    | D SP                            | PCR              | 168           | 8               | High                           | Medium                |
| <i>Rickettsia</i> (SFGR) | Mourembou et al. (2015) <sup>184</sup>          | Gabon                            | 2011-2012    | UN                              | PCR              | 793           | 8               | Low                            | Low                   |
| <i>Rickettsia</i> (SFGR) | Mourembou et al. (2015) <sup>185</sup>          | Gabon                            | 2013-2014    | UN                              | PCR              | 410           | 42              | Low                            | Low                   |

| Pathogen                 | First author, year of publication and reference | Country                          | Study Period | Study Population Classification | Diagnostics Used  | Number Tested | Number Positive | Representativeness Bias Coding | Precision Bias Coding |
|--------------------------|-------------------------------------------------|----------------------------------|--------------|---------------------------------|-------------------|---------------|-----------------|--------------------------------|-----------------------|
| <i>Rickettsia</i> (SFGR) | Ndip et al. (2004) <sup>186</sup>               | Cameroon                         | 2003-2003    | UN                              | PCR               | 118           | 7               | Medium                         | High                  |
| <i>Rickettsia</i> (SFGR) | Prakash et al. (2012) <sup>187</sup>            | India                            | 2006-2008    | D SP                            | PCR               | 58            | 34              | High                           | High                  |
| <i>Rickettsia</i> (SFGR) | Reller et al. (2012) <sup>165</sup>             | Sri Lanka                        | 2007-2007    | UN                              | IFA               | 883           | 108             | Low                            | Low                   |
| <i>Rickettsia</i> (SFGR) | Reller et al. (2016) <sup>58</sup>              | Nicaragua                        | 2008-2009    | UN                              | IFA               | 748           | 6               | Low                            | Low                   |
| <i>Rickettsia</i> (SFGR) | Richards et al. (2010) <sup>188</sup>           | Kenya                            | 2006-2008    | UN                              | PCR               | 163           | 6               | Medium                         | Medium                |
| <i>Rickettsia</i> (SFGR) | Sokhna et al. (2013) <sup>16</sup>              | Senegal                          | 2011-2012    | UN                              | PCR               | 440           | 28              | Low                            | Low                   |
| <i>Rickettsia</i> (SFGR) | Sothmann et al. (2017) <sup>189</sup>           | Ghana                            | 2012-2012    | UN                              | PCR               | 431           | 6               | Medium                         | Low                   |
| <i>Rickettsia</i> (TGR)  | Blacksell et al. (2007) <sup>155</sup>          | Nepal                            | 2002-2004    | UN                              | IFA               | 103           | 9               | Low                            | High                  |
| <i>Rickettsia</i> (TGR)  | Blacksell et al. (2010) <sup>156</sup>          | Lao People's Democratic Republic | 2003-2007    | D SP                            | IFA               | 1030          | 183             | High                           | Low                   |
| <i>Rickettsia</i> (TGR)  | Chansamouth et al. (2016) <sup>116</sup>        | Lao People's Democratic Republic | 2006-2010    | UN                              | IFA, Culture, PCR | 217           | 15              | Medium                         | Medium                |
| <i>Rickettsia</i> (TGR)  | Chen et al. (2014) <sup>71</sup>                | China                            | 2011-2012    | D HEM                           | IFA               | 85            | 1               | High                           | High                  |
| <i>Rickettsia</i> (TGR)  | Chheng et al. (2013) <sup>82</sup>              | Cambodia                         | 2009-2010    | UN                              | PCR, IFA          | 1179          | 5               | Low                            | Low                   |
| <i>Rickettsia</i> (TGR)  | Chowdhury et al. (2017) <sup>173</sup>          | Bangladesh                       | 2015-2016    | D SP                            | PCR               | 414           | 1               | High                           | Low                   |
| <i>Rickettsia</i> (TGR)  | Crump et al. (2013) <sup>33</sup>               | United Republic of Tanzania      | 2007-2008    | UN                              | IFA               | 450           | 2               | Low                            | Low                   |
| <i>Rickettsia</i> (TGR)  | Faruque et al. (2017) <sup>12</sup>             | Thailand                         | 2008-2009    | UN                              | PCR               | 720           | 1               | Medium                         | Low                   |
| <i>Rickettsia</i> (TGR)  | Gasem et al. (2009) <sup>121</sup>              | Indonesia                        | 2005-2006    | UN                              | IFA               | 137           | 4               | Low                            | High                  |
| <i>Rickettsia</i> (TGR)  | Hidalgo et al. (2008) <sup>190</sup>            | Colombia                         | 2005-2005    | UN                              | IFA               | 120           | 14              | Low                            | High                  |
| <i>Rickettsia</i> (TGR)  | Hidalgo et al. (2013) <sup>177</sup>            | Colombia                         | 2010-2011    | D SP                            | IFA               | 26            | 2               | High                           | High                  |
| <i>Rickettsia</i> (TGR)  | Kingston et al. (2018) <sup>160</sup>           | Bangladesh                       | 2014-2015    | UN                              | PCR               | 416           | 24              | Low                            | Low                   |
| <i>Rickettsia</i> (TGR)  | Manock et al. (2009) <sup>38</sup>              | Ecuador                          | 2001-2004    | UN                              | ELISA             | 255           | 8               | Medium                         | Medium                |
| <i>Rickettsia</i> (TGR)  | Maude et al. (2015) <sup>163</sup>              | Bangladesh                       | 2012-2012    | UN                              | PCR               | 300           | 2               | Low                            | Medium                |

| Pathogen                      | First author, year of publication and reference | Country                          | Study Period | Study Population Classification | Diagnostics Used  | Number Tested | Number Positive | Representativeness Bias Coding | Precision Bias Coding |
|-------------------------------|-------------------------------------------------|----------------------------------|--------------|---------------------------------|-------------------|---------------|-----------------|--------------------------------|-----------------------|
| <i>Rickettsia</i> (TGR)       | Mayxay et al. (2013) <sup>131</sup>             | Lao People's Democratic Republic | 2008-2010    | UN                              | PCR               | 1849          | 12              | Low                            | Low                   |
| <i>Rickettsia</i> (TGR)       | McGready et al. (2010) <sup>133</sup>           | Thailand                         | 2004-2006    | UN                              | Culture, PCR, IFA | 203           | 14              | Medium                         | Medium                |
| <i>Rickettsia</i> (TGR)       | Mongkol et al. (2018) <sup>183</sup>            | Thailand                         | 2012-2014    | D SP                            | PCR               | 168           | 3               | High                           | Medium                |
| <i>Rickettsia</i> (TGR)       | Pradhan et al. (2012) <sup>191</sup>            | Nepal                            | 2006-2007    | UN                              | PCR               | 1039          | 22              | Low                            | Low                   |
| <i>Rickettsia</i> (TGR)       | Reller et al. (2012) <sup>165</sup>             | Sri Lanka                        | 2007-2007    | UN                              | IFA               | 883           | 61              | Low                            | Low                   |
| <i>Rickettsia</i> (TGR)       | Reller et al. (2016) <sup>58</sup>              | Nicaragua                        | 2008-2009    | UN                              | IFA               | 748           | 1               | Low                            | Low                   |
| <i>Rickettsia</i> (TGR)       | Thompson et al. (2015) <sup>78</sup>            | Nepal                            | 2008-2011    | UN                              | IFA               | 125           | 21              | Low                            | High                  |
| <i>Rickettsia</i> (TGR)       | Zimmerman et al. (2008) <sup>192</sup>          | Nepal                            | 2001-2001    | UN                              | PCR               | 756           | 50              | Low                            | Low                   |
| <i>Rickettsia</i> spp.        | Hercik et al. (2017) <sup>13</sup>              | United Republic of Tanzania      | 2014-2015    | UN                              | PCR               | 842           | 2               | Low                            | Low                   |
| <i>Rickettsia</i> spp.        | Kingston et al. (2018) <sup>160</sup>           | Bangladesh                       | 2014-2015    | UN                              | PCR               | 416           | 3               | Low                            | Low                   |
| <i>Rickettsia</i> spp.        | Mongkol et al. (2018) <sup>183</sup>            | Thailand                         | 2012-2014    | D SP                            | PCR               | 168           | 15              | High                           | Medium                |
| <i>Rickettsia</i> spp.        | Mueller et al. (2014) <sup>134</sup>            | Cambodia                         | 2008-2010    | UN                              | PCR               | 1193          | 2               | Low                            | Low                   |
| <i>Rickettsia</i> spp.        | Ricapa-Antay et al. (2018) <sup>145</sup>       | Peru                             | 2016-2016    | UN                              | PCR               | 139           | 9               | Medium                         | Medium                |
| Rift Valley fever virus       | Baudin et al. (2016) <sup>193</sup>             | Sudan                            | 2011-2012    | UN                              | IgM               | 130           | 17              | Medium                         | High                  |
| Rift Valley fever virus       | Guillebaud et al. (2018) <sup>122</sup>         | Madagascar                       | 2014-2015    | UN                              | PCR               | 682           | 1               | Low                            | Low                   |
| Rift Valley fever virus       | Schoepp et al. (2014) <sup>103</sup>            | Sierra Leone                     | 2006-2008    | D SP                            | ELISA             | 253           | 5               | High                           | Medium                |
| Rift Valley fever virus       | Sow et al. (2016) <sup>194</sup>                | Senegal                          | 2009-2013    | UN                              | PCR               | 13845         | 1               | Low                            | Low                   |
| <i>Salmonella</i> (non-Typhi) | Akinyemi et al. (2007) <sup>195</sup>           | Nigeria                          | 2004-2005    | D GI                            | Culture           | 235           | 16              | High                           | Medium                |
| <i>Salmonella</i> (non-Typhi) | Akinyemi et al. (2015) <sup>196</sup>           | Nigeria                          | 2010-2011    | UN                              | Culture           | 135           | 2               | Low                            | High                  |
| <i>Salmonella</i> (non-Typhi) | Al-Emran et al. (2016) <sup>197</sup>           | No Specific Country              | 2011-2013    | UN                              | Culture           | 8161          | 28              | Low                            | Low                   |
| <i>Salmonella</i> (non-Typhi) | Al-Emran et al. (2016) <sup>198</sup>           | No Specific Country              | NA-NA        | UN                              | Culture           | 10636         | 77              | Low                            | Low                   |



| Pathogen                      | First author, year of publication and reference | Country                     | Study Period | Study Population Classification | Diagnostics Used | Number Tested | Number Positive | Representativeness Bias Coding | Precision Bias Coding |
|-------------------------------|-------------------------------------------------|-----------------------------|--------------|---------------------------------|------------------|---------------|-----------------|--------------------------------|-----------------------|
| <i>Salmonella</i> (non-Typhi) | Andualem et al. (2014) <sup>199</sup>           | Ethiopia                    | 2010-2011    | D SP                            | Culture          | 270           | 7               | High                           | Medium                |
| <i>Salmonella</i> (non-Typhi) | Bello et al. (2018) <sup>200</sup>              | Nigeria                     | NA-NA        | D COMORBID                      | Culture          | 225           | 10              | High                           | Medium                |
| <i>Salmonella</i> (non-Typhi) | Biggs et al. (2014) <sup>201</sup>              | United Republic of Tanzania | 2006-2008    | UN                              | Culture          | 4106          | 163             | Low                            | Low                   |
| <i>Salmonella</i> (non-Typhi) | Bilman et al. (2017) <sup>202</sup>             | Turkey                      | 2014-2014    | D GI                            | Culture          | 48            | 10              | High                           | High                  |
| <i>Salmonella</i> (non-Typhi) | Brooks et al. (2005) <sup>203</sup>             | Bangladesh                  | 2000-2001    | UN                              | Culture          | 888           | 2               | Low                            | Low                   |
| <i>Salmonella</i> (non-Typhi) | Brown et al. (2017) <sup>204</sup>              | Nigeria                     | 2013-2014    | D COMORBID                      | Culture          | 116           | 1               | High                           | High                  |
| <i>Salmonella</i> (non-Typhi) | Chheng et al. (2013) <sup>82</sup>              | Cambodia                    | 2009-2010    | UN                              | Culture          | 1180          | 1               | Low                            | Low                   |
| <i>Salmonella</i> (non-Typhi) | Crump et al. (2011) <sup>205</sup>              | United Republic of Tanzania | 2007-2008    | UN                              | Culture          | 224           | 2               | Low                            | Medium                |
| <i>Salmonella</i> (non-Typhi) | Crump et al. (2011) <sup>206</sup>              | United Republic of Tanzania | 2007-2008    | UN                              | Culture          | 139           | 1               | Low                            | Medium                |
| <i>Salmonella</i> (non-Typhi) | D'Acremont et al. (2014) <sup>207</sup>         | United Republic of Tanzania | 2008-2008    | UN                              | Culture          | 424           | 1               | Low                            | Low                   |
| <i>Salmonella</i> (non-Typhi) | Davies et al. (2016) <sup>208</sup>             | Nigeria                     | NA-NA        | UN                              | Culture          | 129           | 15              | Low                            | High                  |
| <i>Salmonella</i> (non-Typhi) | Dong et al. (2014) <sup>209</sup>               | China                       | 2009-2011    | UN                              | Culture          | 2529          | 3               | Low                            | Low                   |
| <i>Salmonella</i> (non-Typhi) | Eibach et al. (2016) <sup>210</sup>             | Ghana                       | 2007-2012    | UN                              | Culture          | 7172          | 215             | Low                            | Low                   |
| <i>Salmonella</i> (non-Typhi) | Gordon et al. (2010) <sup>211</sup>             | Malawi                      | NA-NA        | UN                              | Culture          | 355           | 70              | Low                            | Medium                |
| <i>Salmonella</i> (non-Typhi) | Hercik et al. (2017) <sup>13</sup>              | United Republic of Tanzania | 2014-2015    | UN                              | PCR              | 842           | 4               | Low                            | Low                   |
| <i>Salmonella</i> (non-Typhi) | Hogan et al. (2018) <sup>46</sup>               | Ghana                       | 2013-2015    | UN                              | Culture          | 1238          | 28              | Low                            | Low                   |
| <i>Salmonella</i> (non-Typhi) | Saha et al. (2017) <sup>212</sup>               | Bangladesh                  | 2012-2016    | UN                              | Culture          | 5185          | 1               | Medium                         | Low                   |
| <i>Salmonella</i> (non-Typhi) | Jeon et al. (2018) <sup>213</sup>               | No Specific Country         | 2010-2014    | UN                              | Culture          | 13431         | 94              | Low                            | Low                   |
| <i>Salmonella</i> (non-Typhi) | Kibuuka et al. (2015) <sup>214</sup>            | Uganda                      | 2012-2012    | UN                              | Culture          | 250           | 11              | Medium                         | Medium                |
| <i>Salmonella</i> (non-Typhi) | Kiemde et al. (2018) <sup>215</sup>             | Burkina Faso                | 2015-2015    | UN                              | Culture          | 684           | 31              | Low                            | Low                   |
| <i>Salmonella</i> (non-Typhi) | Ley et al. (2009) <sup>216</sup>                | United Republic of Tanzania | 2008-2009    | UN                              | Culture          | 1680          | 49              | Low                            | Low                   |
| <i>Salmonella</i> (non-Typhi) | Mahende et al. (2014) <sup>217</sup>            | United Republic of Tanzania | 2013-2013    | UN                              | Culture          | 808           | 2               | Low                            | Low                   |

| Pathogen                      | First author, year of publication and reference | Country                     | Study Period | Study Population Classification | Diagnostics Used | Number Tested | Number Positive | Representativeness Bias Coding | Precision Bias Coding |
|-------------------------------|-------------------------------------------------|-----------------------------|--------------|---------------------------------|------------------|---------------|-----------------|--------------------------------|-----------------------|
| <i>Salmonella</i> (non-Typhi) | Marks et al. (2017) <sup>218</sup>              | No Specific Country         | 2010-2014    | UN                              | Culture          | 13431         | 94              | Low                            | Low                   |
| <i>Salmonella</i> (non-Typhi) | Meremo et al. (2012) <sup>219</sup>             | United Republic of Tanzania | NA-NA        | UN                              | Culture          | 346           | 12              | Low                            | Medium                |
| <i>Salmonella</i> (non-Typhi) | Moon et al. (2013) <sup>220</sup>               | Mozambique                  | 2012-2012    | D COMORBID                      | Culture          | 258           | 28              | High                           | Medium                |
| <i>Salmonella</i> (non-Typhi) | Mourembou et al. (2016) <sup>221</sup>          | Gabon                       | NA-NA        | UN                              | PCR              | 410           | 3               | Low                            | Low                   |
| <i>Salmonella</i> (non-Typhi) | Mtove et al. (2010) <sup>222</sup>              | United Republic of Tanzania | 2008-2009    | UN                              | Culture          | 1502          | 45              | Low                            | Low                   |
| <i>Salmonella</i> (non-Typhi) | Mtove et al. (2011) <sup>223</sup>              | United Republic of Tanzania | 2006-2010    | UN                              | Culture          | 6836          | 232             | Low                            | Low                   |
| <i>Salmonella</i> (non-Typhi) | Mtove et al. (2011) <sup>224</sup>              | United Republic of Tanzania | 2009-2010    | UN                              | Culture          | 965           | 1               | Medium                         | Low                   |
| <i>Salmonella</i> (non-Typhi) | Nadjm et al. (2010) <sup>225</sup>              | United Republic of Tanzania | NA-NA        | UN                              | Culture          | 3639          | 160             | Low                            | Low                   |
| <i>Salmonella</i> (non-Typhi) | Nadjm et al. (2012) <sup>226</sup>              | United Republic of Tanzania | 2007-2007    | UN                              | Culture          | 198           | 5               | Low                            | Medium                |
| <i>Salmonella</i> (non-Typhi) | Ochaya et al. (2018) <sup>227</sup>             | Uganda                      | 2013-2013    | D COMORBID                      | Culture          | 256           | 3               | High                           | Medium                |
| <i>Salmonella</i> (non-Typhi) | Onchiri et al. (2016) <sup>228</sup>            | Kenya                       | 2012-2014    | UN                              | Culture          | 1496          | 19              | Low                            | Low                   |
| <i>Salmonella</i> (non-Typhi) | Onyango et al. (2008) <sup>229</sup>            | Kenya                       | 2004-2005    | D GI                            | Culture          | 20            | 18              | High                           | High                  |
| <i>Salmonella</i> (non-Typhi) | Onyango et al. (2009) <sup>230</sup>            | Kenya                       | 2004-2005    | D GI                            | Culture          | 40            | 20              | High                           | High                  |
| <i>Salmonella</i> (non-Typhi) | Park et al. (2016) <sup>231</sup>               | No Specific Country         | 2010-2014    | UN                              | Culture          | 13431         | 73              | Low                            | Low                   |
| <i>Salmonella</i> (non-Typhi) | Peters et al. (2004) <sup>232</sup>             | Malawi                      | 2000-2000    | UN                              | Culture          | 352           | 44              | Low                            | Medium                |
| <i>Salmonella</i> (non-Typhi) | Pradhan et al. (2012) <sup>191</sup>            | Nepal                       | 2006-2007    | UN                              | Culture          | 1039          | 2               | Low                            | Low                   |
| <i>Salmonella</i> (non-Typhi) | Preziosi et al. (2015) <sup>233</sup>           | Mozambique                  | 2011-2014    | UN                              | Culture          | 841           | 10              | Low                            | Low                   |
| <i>Salmonella</i> (non-Typhi) | Sothmann et al. (2015) <sup>234</sup>           | Ghana                       | 2012-2012    | UN                              | Culture          | 2306          | 24              | Low                            | Low                   |
| <i>Salmonella</i> (non-Typhi) | Tezcan et al. (2006) <sup>235</sup>             | Turkey                      | 1996-2004    | D COMORBID                      | Culture          | 621           | 1               | High                           | Low                   |
| <i>Salmonella</i> (non-Typhi) | Wiersinga et al. (2015) <sup>236</sup>          | Gabon                       | 2012-2013    | UN                              | Culture          | 941           | 5               | Low                            | Low                   |
| <i>Schistosoma mansoni</i>    | Degarege et al. (2012) <sup>237</sup>           | Ethiopia                    | 2010-2011    | UN                              | Microscopy       | 702           | 82              | Low                            | Low                   |
| <i>Streptococcus</i> spp.     | Hinjoy et al. (2017) <sup>238</sup>             | Thailand                    | 2015-2015    | UN                              | Culture          | 70            | 1               | Medium                         | High                  |

| Pathogen                             | First author, year of publication and reference | Country                     | Study Period | Study Population Classification | Diagnostics Used       | Number Tested | Number Positive | Representativeness Bias Coding | Precision Bias Coding |
|--------------------------------------|-------------------------------------------------|-----------------------------|--------------|---------------------------------|------------------------|---------------|-----------------|--------------------------------|-----------------------|
| <i>Toxoplasma gondii</i>             | Adurthi et al. (2008) <sup>239</sup>            | India                       | NA-NA        | D COMORBID                      | PCR                    | 162           | 21              | High                           | Medium                |
| Venezuelan Equine Encephalitis virus | Forshey et al. (2010) <sup>240</sup>            | No Specific Country         | 2000-2007    | UN                              | Culture, PCR, ELISA    | 13259         | 250             | Low                            | Low                   |
| Venezuelan Equine Encephalitis virus | Kocher et al. (2016) <sup>241</sup>             | Peru                        | 2013-2014    | UN                              | PCR                    | 2054          | 22              | Low                            | Low                   |
| Venezuelan Equine Encephalitis virus | Manock et al. (2009) <sup>38</sup>              | Ecuador                     | 2001-2004    | UN                              | Culture, IgM, IFA, PCR | 229           | 2               | Medium                         | Medium                |
| Venezuelan Equine Encephalitis virus | Morrison et al. (2008) <sup>242</sup>           | Peru                        | 2005-2006    | UN                              | IFA, PCR               | 1136          | 34              | High                           | Low                   |
| West Nile virus                      | Boisen et al. (2015) <sup>101</sup>             | Sierra Leone                | 2012-2012    | D SP                            | PCR                    | 23            | 4               | High                           | High                  |
| West Nile virus                      | Chinikar et al. (2012) <sup>243</sup>           | Iran (Islamic Republic of)  | 2008-2009    | D NEU                           | PCR                    | 249           | 3               | High                           | Medium                |
| West Nile virus                      | Elyan et al. (2014) <sup>244</sup>              | Afghanistan                 | 2008-2010    | UN                              | PRNT                   | 277           | 24              | Medium                         | Medium                |
| West Nile virus                      | Hercik et al. (2017) <sup>13</sup>              | United Republic of Tanzania | 2014-2015    | UN                              | PCR                    | 842           | 1               | Low                            | Low                   |
| West Nile virus                      | Kumar et al. (2014) <sup>245</sup>              | India                       | 2009-2010    | UN                              | PCR                    | 105           | 27              | High                           | High                  |
| West Nile virus                      | Rutvisuttinunt et al. (2014) <sup>246</sup>     | Nepal                       | 2009-2010    | D SP                            | PCR                    | 14            | 2               | High                           | High                  |
| West Nile virus                      | Tigoi et al. (2015) <sup>247</sup>              | Kenya                       | 2009-2012    | UN                              | PRNT                   | 379           | 47              | Low                            | Medium                |
| West Nile virus                      | Williams et al. (2018) <sup>248</sup>           | United Republic of Tanzania | 2013-2014    | UN                              | Sequencing             | 12            | 2               | Medium                         | High                  |
| <i>Yersinia pestis</i>               | Sinyange et al. (2016) <sup>249</sup>           | Zambia                      | 2015-2015    | D SP                            | PCR                    | 12            | 6               | High                           | High                  |

492  
493

**Table S7: Summary of number of studies from each global region represented in the study dataset.**

| WHO Region            | Number (%) of malaria endemic countries contributing data | Number (%) of studies contributing data (n=235 <sup>1</sup> ) |
|-----------------------|-----------------------------------------------------------|---------------------------------------------------------------|
| Africa                | 21 of 44 (47.7%)                                          | 83 (35.3%)                                                    |
| Americas              | 8 of 23 (34.8%)                                           | 21 (8.9%)                                                     |
| Eastern Mediterranean | 8 of 14 (57.1%)                                           | 22 (9.4%)                                                     |
| Europe                | 2 of 9 (22.2%)                                            | 6 (2.6%)                                                      |
| South-East Asia       | 8 of 10 (80.0%)                                           | 81 (34.5%)                                                    |
| Western Pacific       | 6 of 10 (60.0%)                                           | 22 (9.4%)                                                     |

494  
495  
496  
497  
498  
499

<sup>1</sup>Table includes data from 235 of 244 articles included in the review, excluding 9 articles reporting data from multiple countries excluded for this analysis.

500  
501  
502

Figure S1: Barchart showing the number of articles contributing data for each country included in the study, displayed by country and WHO region.

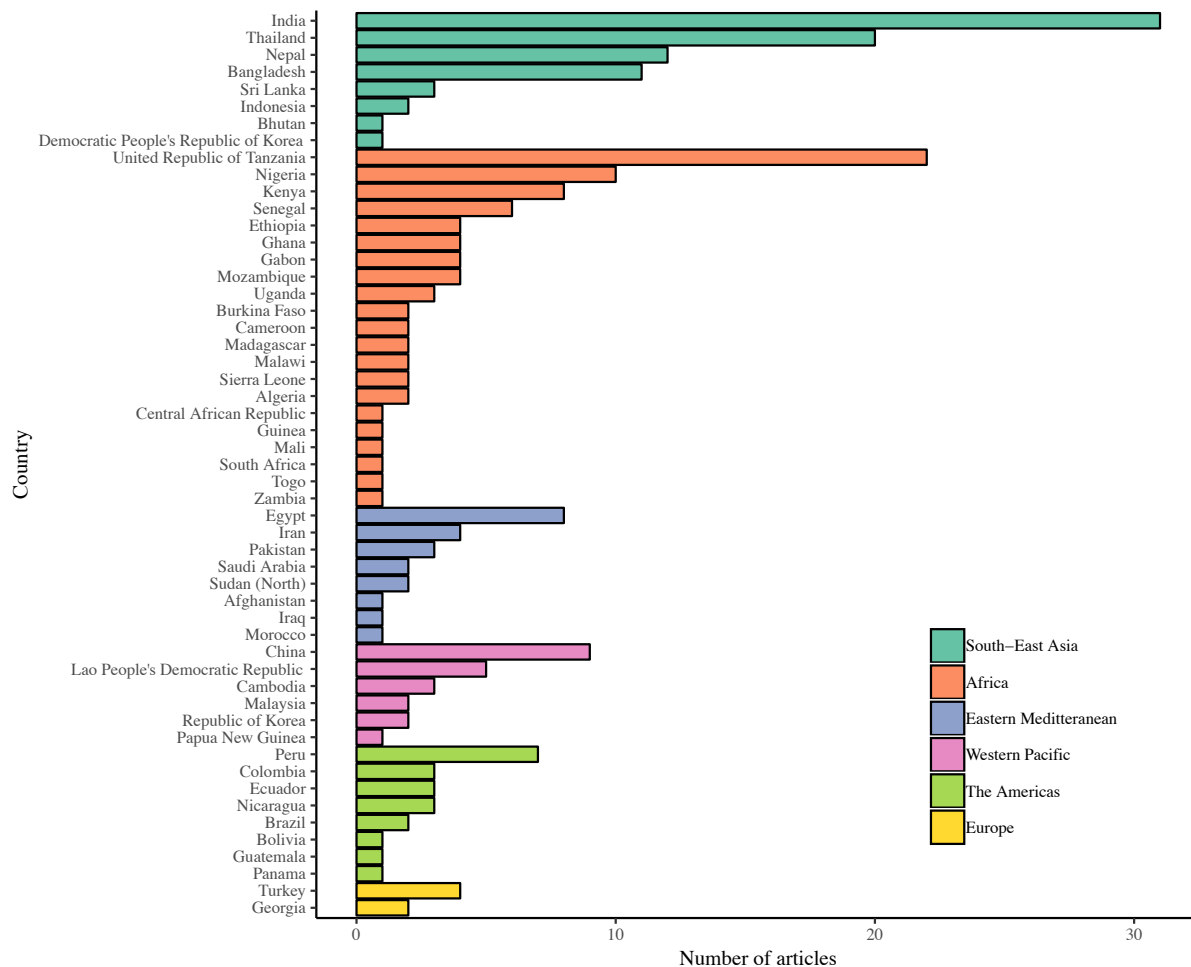

503  
504  
505

506  
507  
508  
509  
510

**Figure S2: Barcharts showing number of articles from each global region contributing data for each of 30 zoonoses.**

Plot panels indicate the WHO defined global region and bar colour indicates type of pathogen.

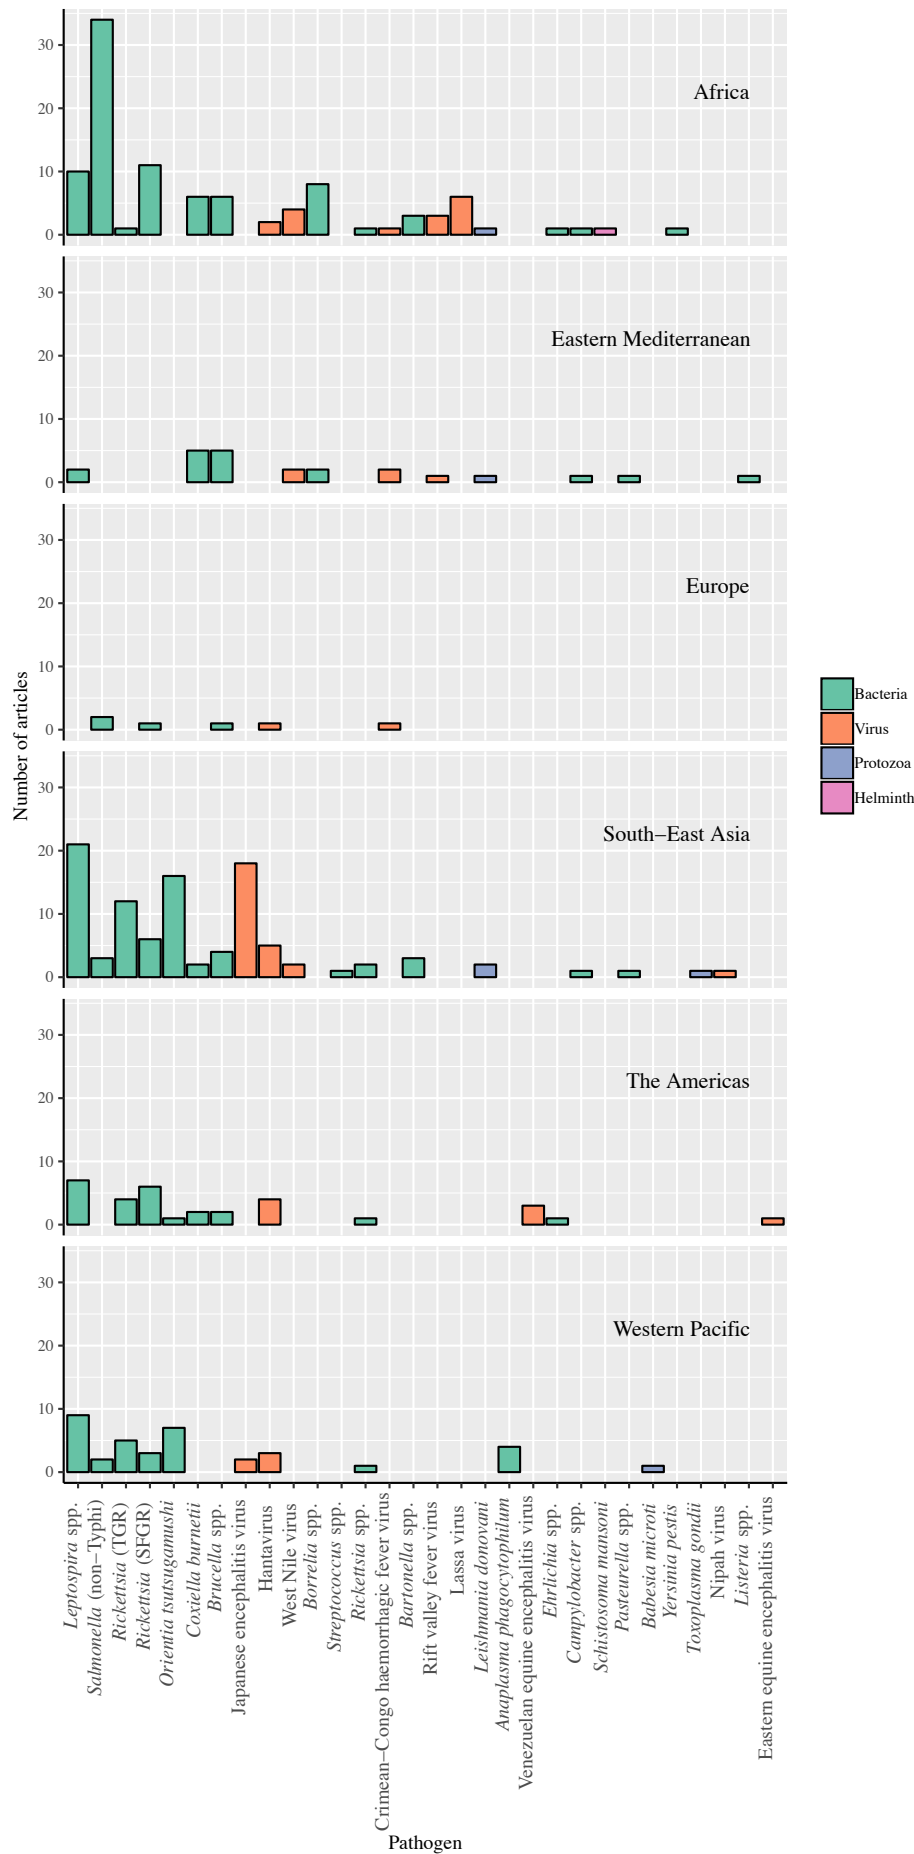

512  
513



514  
515  
516  
517  
518  
519  
520  
521  
522  
523  
524  
525  
526  
527  
528  
529  
530  
531  
532  
533  
534  
535  
536  
537  
538  
539  
540  
541  
542  
543  
544  
545  
546  
547  
548  
549  
550  
551  
552  
553  
554  
555  
556  
557  
558  
559  
560  
561  
562  
563  
564  
565  
566  
567  
568  
569  
570  
571  
572  
573

## References

1. R Core Team. R: A Language and Environment for Statistical Computing. 2018. <http://www.R-project.org> (Accessed 01 October 2019).
2. Taylor LH, Latham SM, Woolhouse ME. Risk factors for human disease emergence. *Philos Trans R Soc Lond B Biol Sci* 2001; **356**: 983-9.
3. WHO. Zoonoses. 2016. <http://www.who.int/zoonoses/diseases/en/> (Accessed 01 June 2016).
4. OIE. OIE-Listed diseases, infections and infestations in force in 2016. 2016. <http://www.oie.int/animal-health-in-the-world/oie-listed-diseases-2016/> (Accessed 01 Jun 2016).
5. Wolfe ND, Dunavan CP, Diamond J. Origins of major human infectious diseases. 2007; **447**: 279-83.
6. Lee SH, Park S, Lee YS, Lee HK, Hwang SD. Diagnosis and molecular characteristics of human infections caused by *Anaplasma phagocytophilum* in South Korea. *J Microbiol* 2018; **56**: 847-53.
7. Yi J, Kim KH, Ko MK, Lee EY, Choi SJ, Oh MD. Human Granulocytic Anaplasmosis as a Cause of Febrile Illness in Korea Since at Least 2006. *Am J Trop Med Hyg* 2017; **96**: 777-82.
8. Zhang L, Cui F, Wang L, et al. Investigation of anaplasmosis in Yiyuan County, Shandong Province, China. *Asian Pac J Trop Med* 2011; **4**: 568-72.
9. Zhang L, Wang G, Liu Q, et al. Molecular analysis of *Anaplasma phagocytophilum* isolated from patients with febrile diseases of unknown etiology in China. *PLoS One* 2013; **8**: e57155.
10. Zhou X, Li SG, Chen SB, et al. Co-infections with *Babesia microti* and *Plasmodium* parasites along the China-Myanmar border. *Infect Dis Poverty* 2013; **2**: 24.
11. Chaudhry R, Kokkayil P, Ghosh A, et al. *Bartonella henselae* infection in diverse clinical conditions in a tertiary care hospital in north India. *Indian J Med Res* 2018; **147**: 189-94.
12. Faruque LI, Zaman RU, Gurley ES, et al. Prevalence and clinical presentation of *Rickettsia*, *Coxiella*, *Leptospira*, *Bartonella* and chikungunya virus infections among hospital-based febrile patients from December 2008 to November 2009 in Bangladesh. *BMC Infect Dis* 2017; **17**: 141.
13. Hercik C, Cosmas L, Mogeni OD, et al. A diagnostic and epidemiologic investigation of acute febrile illness (AFI) in Kilombero, Tanzania. *PLoS One* 2017; **12**: e0189712.
14. Kosoy M, Bai Y, Sheff K, et al. Identification of *Bartonella* infections in febrile human patients from Thailand and their potential animal reservoirs. *Am J Trop Med Hyg* 2010; **82**: 1140-5.
15. Simpson GJG, Quan V, Frean J, et al. Prevalence of Selected Zoonotic Diseases and Risk Factors at a Human-Wildlife-Livestock Interface in Mpumalanga Province, South Africa. 2018; **18**: 303-10.
16. Sokhna C, Mediannikov O, Fenollar F, et al. Point-of-care laboratory of pathogen diagnosis in rural Senegal. *PLoS Negl Trop Dis* 2013; **7**: e1999.
17. Aarsland SJ, Castellanos-Gonzalez A, Lockamy KP, et al. Treatable bacterial infections are underrecognized causes of fever in Ethiopian children. *Am J Trop Med Hyg* 2012; **87**: 128-33.
18. Elhelw RA, El-Enbaawy MI, Samir A. Lyme borreliosis: A neglected zoonosis in Egypt. *Acta Trop* 2014; **140**: 188-92.
19. Fotso Fotso A, Angelakis E, Mouffok N, Drancourt M, Raoult D. Blood-Borne Candidatus *Borrelia algerica* in a Patient with Prolonged Fever in Oran, Algeria. *Am J Trop Med Hyg* 2015; **93**: 1070-3.
20. Mediannikov O, Socolovschi C, Bassene H, et al. *Borrelia crocidurae* infection in acutely febrile patients, Senegal. *Emerg Infect Dis* 2014; **20**: 1335-8.
21. Nordstrand A, Bunikis I, Larsson C, et al. Tickborne relapsing fever diagnosis obscured by malaria, Togo. *Emerg Infect Dis* 2007; **13**: 117-23.
22. Parola P, Diatta G, Socolovschi C, et al. Tick-borne relapsing fever borreliosis, rural Senegal. *Emerg Infect Dis* 2011; **17**: 883-5.
23. Reller ME, Clemens EG, Schachterle SE, Mtove GA, Sullivan DJ, Dumler JS. Multiplex 5' nuclease-quantitative PCR for diagnosis of relapsing fever in a large Tanzanian cohort. *J Clin Microbiol* 2011; **49**: 3245-9.
24. Sarih M, Garnier M, Boudebouch N, et al. *Borrelia hispanica* relapsing fever, Morocco. *Emerg Infect Dis* 2009; **15**: 1626-9.
25. Toure M, Petersen PT, Bathily SN, et al. Molecular Evidence of Malaria and Zoonotic Diseases Among Rapid Diagnostic Test-Negative Febrile Patients in Low-Transmission Season, Mali. *Am J Trop Med Hyg* 2017; **96**: 335-7.
26. Afifi S, Earhart K, Azab MA, et al. Hospital-based surveillance for acute febrile illness in Egypt: a focus on community-acquired bloodstream infections. *Am J Trop Med Hyg* 2005; **73**: 392-9.
27. Barua A, Kumar A, Thavaselvam D, et al. Isolation & characterization of *Brucella melitensis* isolated from patients suspected for human brucellosis in India. *Indian J Med Res* 2016; **143**: 652-8.
28. Boone I, Henning K, Hilbert A, et al. Are brucellosis, Q fever and melioidosis potential causes of febrile illness in Madagascar? *Acta Trop* 2017; **172**: 255-62.

- 574 29. Bouley AJ, Biggs HM, Stoddard RA, et al. Brucellosis among Hospitalized Febrile Patients in Northern  
575 Tanzania. *Am J Trop Med Hyg* 2012; **87**: 1105-11.
- 576 30. Carugati M, Biggs HM, Maze MJ, et al. Incidence of human brucellosis in the Kilimanjaro Region of  
577 Tanzania in the periods 2007-2008 and 2012-2014. *Trans R Soc Trop Med Hyg* 2018; **112**: 136-43.
- 578 31. Cash-Goldwasser S, Maze MJ, Rubach MP, et al. Risk Factors for Human Brucellosis in Northern  
579 Tanzania. *Am J Trop Med Hyg* 2018; **98**: 598-606.
- 580 32. Ciftdogan DY, Bayram N, Vardar F. Brucellosis as a cause of fever of unknown origin in children  
581 admitted to a tertiary hospital in the Aegean region of Turkey. *Vector Borne Zoonotic Dis* 2011; **11**: 1037-40.
- 582 33. Crump JA, Morrissey AB, Nicholson WL, et al. Etiology of severe non-malaria febrile illness in  
583 Northern Tanzania: a prospective cohort study. *PLoS Negl Trop Dis* 2013; **7**: e2324.
- 584 34. Fadeel MA, Wasfy MO, Pimentel G, Klena JD, Mahoney FJ, Hajjeh RA. Rapid enzyme-linked  
585 immunosorbent assay for the diagnosis of human brucellosis in surveillance and clinical settings in Egypt. 2006;  
586 **27**: 975-81.
- 587 35. Jennings GJ, Hajjeh RA, Girgis FY, et al. Brucellosis as a cause of acute febrile illness in Egypt. *Trans*  
588 *R Soc Trop Med Hyg* 2007; **101**: 707-13.
- 589 36. Kamal IH, Al Gashgari B, Moselhy SS, Kumosani TA, Abulnaja KO. Two-stage PCR assay for  
590 detection of human brucellosis in endemic areas. *BMC Infect Dis* 2013; **13**: 145.
- 591 37. Kuila P, Dutta D, Chakrabarty U, Chatterjee D, Das S. Comparison of serological tests and PCR for  
592 diagnosis of human brucellosis suffering from fever. *Asian J Pharm Clin Res* 2017; **10**: 109-11.
- 593 38. Manock SR, Jacobsen KH, de Bravo NB, et al. Etiology of acute undifferentiated febrile illness in the  
594 Amazon basin of Ecuador. *Am J Trop Med Hyg* 2009; **81**: 146-51.
- 595 39. Mattar S, Tique V, Miranda J, Montes E, Garzon D. Undifferentiated tropical febrile illness in Cordoba,  
596 Colombia: Not everything is dengue. *J Infect Public Health* 2017; **10**: 507-12.
- 597 40. Migisha R, Dan N, Boum Y, et al. Prevalence and risk factors of brucellosis among febrile patients  
598 attending a community hospital in south western Uganda. *Sci Rep* 2018; **8**: 15465.
- 599 41. Nandagopal B, Sankar S, Lingesan K, Appu K, Sridharan G, Gopinathan A. Application of polymerase  
600 chain reaction to detect *Burkholderia pseudomallei* and *Brucella* species in buffy coat from patients with febrile  
601 illness among rural and peri-urban population. *J Glob Infect Dis* 2012; **4**: 31-7.
- 602 42. Paul E, Abdelkareem M, Malik S. Overview of human brucellosis in Aseer region, Saudi Arabia. *Aust*  
603 *Med J* 2017; **10**: 202-10.
- 604 43. Rahman AA, Berkvens D, Saegerman C, et al. Seroprevalence of brucellosis in patients with prolonged  
605 fever in Bangladesh. *J Infect Dev Ctries* 2016; **10**: 939-46.
- 606 44. Ali A, Akhund T, Warraich GJ, et al. Respiratory viruses associated with severe pneumonia in children  
607 under 2 years old in a rural community in Pakistan. *J Med Virol* 2016; **88**: 1882-90.
- 608 45. Bottieau E, Clerinx J, Vlieghe E, et al. Epidemiology and outcome of *Shigella*, *Salmonella* and  
609 *Campylobacter* infections in travellers returning from the tropics with fever and diarrhoea. *Acta Clin Belg* 2011;  
610 **66**: 191-5.
- 611 46. Hogan B, Eibach D, Krumkamp R, et al. Malaria Coinfections in Febrile Pediatric Inpatients: A  
612 Hospital-Based Study From Ghana. *Clin Infect Dis* 2018; **66**: 1838-45.
- 613 47. Naheed A, Ram PK, Brooks WA, et al. Clinical value of Tubex and Typhidot rapid diagnostic tests for  
614 typhoid fever in an urban community clinic in Bangladesh. *Diagn Microbiol Infect Dis* 2008; **61**: 381-6.
- 615 48. Angelakis E, Mediannikov O, Socolovschi C, et al. *Coxiella burnetii*-positive PCR in febrile patients in  
616 rural and urban Africa. *Int J Infect Dis* 2014; **28**: 107-10.
- 617 49. Esmacili S, Golzar F, Ayubi E, Naghili B, Mostafavi E. Acute Q fever in febrile patients in  
618 northwestern of Iran. *PLoS Negl Trop Dis* 2017; **11**: e0005535.
- 619 50. Greiner AL, Bhengsi S, Million M, et al. Acute Q Fever Case Detection among Acute Febrile Illness  
620 Patients, Thailand, 2002-2005. *Am J Trop Med Hyg* 2018; **98**: 252-7.
- 621 51. Hamilton LR, George DL, Scoville SL, Hospenthal DR, Griffith ME. PCR for rapid diagnosis of acute  
622 Q fever at a combat support hospital in Iraq. *Mil Med* 2011; **176**: 103-5.
- 623 52. Khalili M, Naderi HR, Salehnia N, Abiri Z. Detection of *Coxiella burnetii* in acute undifferentiated  
624 febrile illnesses (AUFIs) in Iran. *Trop Doct* 2016; **46**: 221-4.
- 625 53. Mazyad SA, Hafez AO. Q fever (*Coxiella burnetii*) among man and farm animals in North Sinai, Egypt.  
626 *J Egypt Soc Parasitol* 2007; **37**: 135-42.
- 627 54. Metanat M, Sepehri Rad N, Alavi-Naini R, et al. Acute Q fever among febrile patients in Zahedan,  
628 southeastern Iran. *Turk J Med Sci* 2014; **44**: 99-103.
- 629 55. Njeru J, Henning K, Pletz MW, et al. Febrile patients admitted to remote hospitals in Northeastern  
630 Kenya: seroprevalence, risk factors and a clinical prediction tool for Q-Fever. *BMC Infect Dis* 2016; **16**: 244.
- 631 56. Pradeep J, Stephen S, Ambrose S, Gunasekaran D. Diagnosis of Acute Q Fever by Detection of  
632 *Coxiella burnetii* DNA using Real-Time PCR, Employing a Commercial Genesig Easy Kit. *J Clin Diagn Res*  
633 2017; **11**: DC10-DC3.

- 634 57. Ratmanov P, Bassene H, Fenollar F, et al. The correlation of Q fever and *Coxiella burnetii* DNA in  
635 household environments in rural Senegal. *Vector Borne Zoonotic Dis* 2013; **13**: 70-2.
- 636 58. Reller ME, Chikeka I, Miles JJ, et al. First Identification and Description of Rickettsioses and Q Fever  
637 as Causes of Acute Febrile Illness in Nicaragua. *PLoS Negl Trop Dis* 2016; **10**: e0005185.
- 638 59. Alam MM, Khurshid A, Sharif S, et al. Genetic analysis and epidemiology of Crimean Congo  
639 Hemorrhagic fever viruses in Baluchistan province of Pakistan. *BMC Infect Dis* 2013; **13**: 201.
- 640 60. Ali N, Chotani RA, Anwar M, Nadeem M, Karamat KA, Tariq WU. A Crimean-Congo haemorrhagic  
641 fever outbreak in northern Balochistan. *J Coll Physicians Surg Pak* 2007; **17**: 477-81.
- 642 61. Bukbuk DN, Dowall SD, Lewandowski K, et al. Serological and Virological Evidence of Crimean-  
643 Congo Haemorrhagic Fever Virus Circulation in the Human Population of Borno State, Northeastern Nigeria.  
644 *PLoS Negl Trop Dis* 2016; **10**: e0005126.
- 645 62. Kuchuloria T, Imnadze P, Mamuchishvili N, et al. Hospital-Based Surveillance for Infectious Etiologies  
646 Among Patients with Acute Febrile Illness in Georgia, 2008-2011. *Am J Trop Med Hyg* 2016; **94**: 236-42.
- 647 63. Aguilar PV, Robich RM, Turell MJ, et al. Endemic eastern equine encephalitis in the Amazon region of  
648 Peru. *Am J Trop Med Hyg* 2007; **76**: 293-8.
- 649 64. Chikeka I, Matute AJ, Dumler JS, Woods CW, Mayorga O, Reller ME. Use of Peptide-Based Enzyme-  
650 Linked Immunosorbent Assay followed by Immunofluorescence Assay To Document *Ehrlichia chaffeensis* as a  
651 Cause of Febrile Illness in Nicaragua. *J Clin Microbiol* 2016; **54**: 1581-5.
- 652 65. Ndip LM, Labruna M, Ndip RN, Walker DH, McBride JW. Molecular and clinical evidence of  
653 *Ehrlichia chaffeensis* infection in Cameroonian patients with undifferentiated febrile illness. *Ann Trop Med*  
654 *Parasitol* 2009; **103**: 719-25.
- 655 66. Armién B, Pascale JM, Muñoz C, et al. Hantavirus fever without pulmonary syndrome in Panama. *Am J*  
656 *Trop Med Hyg* 2013; **89**: 489-94.
- 657 67. Castillo Ore RM, Forshey BM, Huaman A, et al. Serologic evidence for human hantavirus infection in  
658 Peru. *Vector Borne Zoonotic Dis* 2012; **12**: 683-9.
- 659 68. Chandy S, Mitra S, Sathish N, et al. A pilot study for serological evidence of hantavirus infection in  
660 human population in south India. *Indian J Med Res* 2005; **122**: 211-5.
- 661 69. Chandy S, Yoshimatsu K, Boorugu HK, et al. Acute febrile illness caused by hantavirus: serological  
662 and molecular evidence from India. *Trans R Soc Trop Med Hyg* 2009; **103**: 407-12.
- 663 70. Chau R, Bhatt N, Manhica I, et al. First serological evidence of hantavirus among febrile patients in  
664 Mozambique. *Int J Infect Dis* 2017; **61**: 51-5.
- 665 71. Chen ZH, Qin XC, Song R, et al. Co-circulation of multiple hemorrhagic fever diseases with distinct  
666 clinical characteristics in Dandong, China. *PLoS One* 2014; **9**: e89896.
- 667 72. Chrispal A, Boorugu H, Gopinath KG, et al. Acute undifferentiated febrile illness in adult hospitalized  
668 patients: the disease spectrum and diagnostic predictors - an experience from a tertiary care hospital in South  
669 India. *Trop Doct* 2010; **40**: 230-4.
- 670 73. Cruz CD, Forshey BM, Vallejo E, et al. Novel strain of Andes virus associated with fatal human  
671 infection, central Bolivia. *Emerg Infect Dis* 2012; **18**: 750-7.
- 672 74. Klempa B, Koivogui L, Sylla O, et al. Serological Evidence of Human Hantavirus Infections in Guinea,  
673 West Africa. *J Infect Dis* 2010; **201**: 1031-4.
- 674 75. Kuchuloria T, Imnadze P, Chokheli M, et al. Short Report: Viral Hemorrhagic Fever Cases in the  
675 Country of Georgia: Acute Febrile Illness Surveillance Study Results. *Am J Trop Med Hyg* 2014; **91**: 246-8.
- 676 76. Liu YX, Feng D, Zhang Q, et al. Key differentiating features between scrub typhus and hemorrhagic  
677 fever with renal syndrome in northern China. *Am J Trop Med Hyg* 2007; **76**: 801-5.
- 678 77. Suharti C, van Gorp EC, Dolmans WM, et al. Hanta virus infection during dengue virus infection  
679 outbreak in Indonesia. *Acta Med Indones* 2009; **41**: 75-80.
- 680 78. Thompson CN, Blacksell SD, Paris DH, et al. Undifferentiated febrile illness in Kathmandu, Nepal. *Am*  
681 *J Trop Med Hyg* 2015; **92**: 875-8.
- 682 79. Zhan J, Cheng J, Hu B, et al. Pathogens and epidemiologic feature of severe fever with  
683 thrombocytopenia syndrome in Hubei province, China. *Virus Res* 2017; **232**: 63-8.
- 684 80. Anga G, Barnabas R, Kaminiel O, et al. The aetiology, clinical presentations and outcome of febrile  
685 encephalopathy in children in Papua New Guinea. *Ann Trop Paediatr* 2010; **30**: 109-18.
- 686 81. Chatterjee S, Chattopadhyay D, Bhattacharya MK, Mukherjee B. Serosurveillance for Japanese  
687 encephalitis in children in several districts of West Bengal, India. *Acta Paediatr* 2004; **93**: 390-3.
- 688 82. Chheng K, Carter MJ, Emary K, et al. A prospective study of the causes of febrile illness requiring  
689 hospitalization in children in Cambodia. *PLoS One* 2013; **8**: e60634.
- 690 83. Dias M, Pattabiraman C, Siddappa S, et al. Complete assembly of a dengue virus type 3 genome from a  
691 recent genotype III clade by metagenomic sequencing of serum. *Wellcome Open Res* 2018; **3**: 44.
- 692 84. Ellis RD, Fukuda MM, McDaniel P, et al. Causes of fever in adults on the Thai-Myanmar border. *Am J*  
693 *Trop Med Hyg* 2006; **74**: 108-13.

- 694 85. Joshi R, Mishra PK, Joshi D, et al. Clinical presentation, etiology, and survival in adult acute  
695 encephalitis syndrome in rural Central India. *Clin Neurol Neurosurg* 2013; **115**: 1753-61.
- 696 86. Kakoti G, Dutta P, Ram Das B, Borah J, Mahanta J. Clinical profile and outcome of Japanese  
697 encephalitis in children admitted with acute encephalitis syndrome. *Biomed Res Int* 2013; **2013**: 152656.
- 698 87. Kumar S, Pandey AK, Gutch M, et al. Acute viral encephalitis clinical features and outcome:  
699 Experience from a tertiary center of North India. *Ann Trop Med Public* 2015; **8**: 262-6.
- 700 88. Maude RR, Ghose A, Samad R, et al. A prospective study of the importance of enteric fever as a cause  
701 of non-malarial febrile illness in patients admitted to Chittagong Medical College Hospital, Bangladesh. *BMC*  
702 *Infect Dis* 2016; **16**: 567.
- 703 89. Medhi M, Saikia L, Patgiri SJ, Lahkar V, Hussain ME, Kakati S. Incidence of Japanese Encephalitis  
704 amongst acute encephalitis syndrome cases in upper Assam districts from 2012 to 2014: A report from a tertiary  
705 care hospital. *Indian J Med Res* 2017; **146**: 267-71.
- 706 90. Rasul CH, Muhammad F, Hossain MJ, Ahmed KU, Rahman M. Acute meningoencephalitis in  
707 hospitalised children in southern Bangladesh. *Malays J Med Sci* 2012; **19**: 67-73.
- 708 91. Rauf A, Singhi S, Nallasamy K, Walia M, Ray P. Non-Respiratory and Non-Diarrheal Causes of Acute  
709 Febrile Illnesses in Children Requiring Hospitalization in a Tertiary Care Hospital in North India: A Prospective  
710 Study. *Am J Trop Med Hyg* 2018; **99**: 783-8.
- 711 92. Rayamajhi A, Singh R, Prasad R, Khanal B, Singhi S. Clinico-laboratory profile and outcome of  
712 Japanese encephalitis in Nepali children. *Ann Trop Paediatr* 2006; **26**: 293-301.
- 713 93. Rayamajhi A, Singh R, Prasad R, Khanal B, Singhi S. Study of Japanese encephalitis and other viral  
714 encephalitis in Nepali children. *Pediatr Int* 2007; **49**: 978-84.
- 715 94. Rayamajhi A, Ansari I, Ledger E, et al. Clinical and prognostic features among children with acute  
716 encephalitis syndrome in Nepal; a retrospective study. *BMC Infect Dis* 2011; **11**.
- 717 95. Sarkar A, Taraphdar D, Mukhopadhyay SK, Chakrabarti S, Chatterjee S. Molecular evidence for the  
718 occurrence of Japanese encephalitis virus genotype I and III infection associated with acute Encephalitis in  
719 Patients of West Bengal, India, 2010. *Virol J* 2012; **9**.
- 720 96. Singh RR, Chaudhary SK, Bhatta NK, Khanal B, Shah D. Clinical and etiological profile of acute  
721 febrile encephalopathy in Eastern Nepal. *Indian J Pediatr* 2009; **76**: 1109-11.
- 722 97. Singh KP, Mishra G, Jain P, et al. Co-positivity of anti-dengue virus and anti-Japanese encephalitis  
723 virus IgM in endemic area: co-infection or cross reactivity? *Asian Pac J Trop Med* 2014; **7**: 124-9.
- 724 98. Swami R, Ratho RK, Mishra B, Singh MP. Usefulness of RT-PCR for the diagnosis of Japanese  
725 encephalitis in clinical samples. *Scand J Infect Dis* 2008; **40**: 815-20.
- 726 99. Taraphdar D, Sarkar A, Chatterjee S. Mass scale screening of common arboviral infections by an  
727 affordable, cost effective RT-PCR method. *Asian Pac J Trop Biomed* 2012; **2**: 97-101.
- 728 100. Akhuenokhan OC, Ewah-Odiase RO, Akpede N, et al. Prevalence of Lassa Virus Disease (LVD) in  
729 Nigerian children with fever or fever and convulsions in an endemic area. *PLoS Negl Trop Dis* 2017; **11**:  
730 e0005711.
- 731 101. Boisen ML, Schieffelin JS, Goba A, et al. Multiple Circulating Infections Can Mimic the Early Stages  
732 of Viral Hemorrhagic Fevers and Possible Human Exposure to Filoviruses in Sierra Leone Prior to the 2014  
733 Outbreak. *Viral Immunol* 2015; **28**: 19-31.
- 734 102. Ehichioya DU, Asogun DA, Ehimuan J, et al. Hospital-based surveillance for Lassa fever in Edo State,  
735 Nigeria, 2005-2008. *Trop Med Int Health* 2012; **17**: 1001-4.
- 736 103. Schoepp RJ, Rossi CA, Khan SH, Goba A, Fair JN. Undiagnosed acute viral febrile illnesses, Sierra  
737 Leone. *Emerg Infect Dis* 2014; **20**: 1176-82.
- 738 104. Shehu NY, Gomerep SS, Isa SE, et al. Lassa Fever 2016 Outbreak in Plateau State, Nigeria-The  
739 Changing Epidemiology and Clinical Presentation. *Front Public Health* 2018; **6**: 232.
- 740 105. Stremlau MH, Andersen KG, Folarin OA, et al. Discovery of novel rhabdoviruses in the blood of  
741 healthy individuals from West Africa. *PLoS Negl Trop Dis* 2015; **9**: e0003631.
- 742 106. Hailu A, Schoone GJ, Diro E, et al. Field evaluation of a fast anti-*Leishmania* antibody detection assay  
743 in Ethiopia. *Trans R Soc Trop Med Hyg* 2006; **100**: 48-52.
- 744 107. Joshi DD, Sharma M, Bhandari S. Visceral leishmaniasis in Nepal during 1980-2006. 2006; **38**: 139-48.
- 745 108. Mukhtar M, Abdoun A, Ahmed AE, et al. Diagnostic accuracy of rK28-based immunochromatographic  
746 rapid diagnostic tests for visceral leishmaniasis: a prospective clinical cohort study in Sudan. *Trans R Soc Trop*  
747 *Med Hyg* 2015; **109**: 594-600.
- 748 109. Rijal S, Boelaert M, Regmi S, et al. Evaluation of a urinary antigen-based latex agglutination test in the  
749 diagnosis of kala-azar in eastern Nepal. *Trop Med Int Health* 2004; **9**: 724-9.
- 750 110. Albuquerque Filho AP, Araujo JG, Souza IQ, et al. Validation of a case definition for leptospirosis  
751 diagnosis in patients with acute severe febrile disease admitted in reference hospitals at the State of Pernambuco,  
752 Brazil. *Rev Soc Bras Med Trop* 2011; **44**: 735-9.

- 753 111. Alia SN, Joseph N, Philip N, et al. Diagnostic accuracy of rapid diagnostic tests for the early detection  
754 of leptospirosis. *J Infect Public Health* 2019; **12**: 263-9.
- 755 112. Barragan V, Chiriboga J, Miller E, et al. High *Leptospira* Diversity in Animals and Humans  
756 Complicates the Search for Common Reservoirs of Human Disease in Rural Ecuador. *PLoS Negl Trop Dis* 2016;  
757 **10**: e0004990.
- 758 113. Biggs HM, Bui DM, Galloway RL, et al. Leptospirosis among hospitalized febrile patients in northern  
759 Tanzania. *Am J Trop Med Hyg* 2011; **85**: 275-81.
- 760 114. Blacksell SD, Smythe L, Phetsouvanh R, et al. Limited diagnostic capacities of two commercial assays  
761 for the detection of *Leptospira* immunoglobulin M antibodies in Laos. *Clin Vaccine Immunol* 2006; **13**: 1166-9.
- 762 115. Boonsilp S, Thaipadungpanit J, Amornchai P, et al. Molecular detection and speciation of pathogenic  
763 *Leptospira* spp. in blood from patients with culture-negative leptospirosis. *BMC Infect Dis* 2011; **11**: 338.
- 764 116. Chansamouth V, Thammasack S, Phetsouvanh R, et al. The Aetiologies and Impact of Fever in  
765 Pregnant Inpatients in Vientiane, Laos. *PLoS Negl Trop Dis* 2016; **10**: e0004577.
- 766 117. Chiriboga J, Barragan V, Arroyo G, et al. High Prevalence of Intermediate *Leptospira* spp. DNA in  
767 Febrile Humans from Urban and Rural Ecuador. *Emerg Infect Dis* 2015; **21**: 2141-7.
- 768 118. Cohen AL, Dowell SF, Nisalak A, Mammen MP, Jr., Petkanchanapong W, Fisk TL. Rapid diagnostic  
769 tests for dengue and leptospirosis: antibody detection is insensitive at presentation. *Trop Med Int Health* 2007;  
770 **12**: 47-51.
- 771 119. Dassanayake DL, Wimalaratna H, Agampodi SB, Liyanapathirana VC, Piyarathna TA,  
772 Goonapienuwala BL. Evaluation of surveillance case definition in the diagnosis of leptospirosis, using the  
773 Microscopic Agglutination Test: a validation study. *BMC Infect Dis* 2009; **9**: 48.
- 774 120. Dittrich S, Boutthasavong L, Keokhamhoung D, et al. A Prospective Hospital Study to Evaluate the  
775 Diagnostic Accuracy of Rapid Diagnostic Tests for the Early Detection of Leptospirosis in Laos. *Am J Trop Med*  
776 *Hyg* 2018; **98**: 1056-60.
- 777 121. Gasem MH, Wagenaar JF, Goris MG, et al. Murine typhus and leptospirosis as causes of acute  
778 undifferentiated fever, Indonesia. *Emerg Infect Dis* 2009; **15**: 975-7.
- 779 122. Guillebaud J, Bernardson B, Randriambolamanantsoa TH, et al. Study on causes of fever in primary  
780 healthcare center uncovers pathogens of public health concern in Madagascar. *PLoS Negl Trop Dis* 2018; **12**:  
781 e0006642.
- 782 123. Hem S, Ly S, Votsi I, et al. Estimating the Burden of Leptospirosis among Febrile Subjects Aged below  
783 20 Years in Kampong Cham Communities, Cambodia, 2007-2009. *PLoS One* 2016; **11**: e0151555.
- 784 124. Hercik C, Cosmas L, Mogeni OD, et al. A Combined Syndromic Approach to Examine Viral, Bacterial,  
785 and Parasitic Agents among Febrile Patients: A Pilot Study in Kilombero, Tanzania. *Am J Trop Med Hyg* 2018;  
786 **98**: 625-32.
- 787 125. Ismail TF, Wasfy MO, Abdul-Rahman B, et al. Retrospective serosurvey of leptospirosis among  
788 patients with acute febrile illness and hepatitis in Egypt. *Am J Trop Med Hyg* 2006; **75**: 1085-9.
- 789 126. Kendall EA, LaRocque RC, Bui DM, et al. Short Report: Leptospirosis as a Cause of Fever in Urban  
790 Bangladesh. *Am J Trop Med Hyg* 2010; **82**: 1127-30.
- 791 127. Koizumi N, Gamage CD, Muto M, et al. Serological and genetic analysis of leptospirosis in patients  
792 with acute febrile illness in Kandy, Sri Lanka. *Jpn J Infect Dis* 2009; **62**: 474-5.
- 793 128. LaRocque RC, Breiman RF, Ari MD, et al. Leptospirosis during dengue outbreak, Bangladesh. *Emerg*  
794 *Infect Dis* 2005; **11**: 766-9.
- 795 129. Libraty DH, Myint KS, Murray CK, et al. A comparative study of leptospirosis and dengue in Thai  
796 children. *PLoS Negl Trop Dis* 2007; **1**: e111.
- 797 130. Matthias MA, Ricaldi JN, Cespedes M, et al. Human leptospirosis caused by a new, antigenically  
798 unique *Leptospira* associated with a *Rattus* species reservoir in the Peruvian Amazon. *PLoS Negl Trop Dis* 2008;  
799 **2**: e213.
- 800 131. Mayxay M, Castonguay-Vanier J, Chansamouth V, et al. Causes of non-malarial fever in Laos: a  
801 prospective study. *Lancet Glob Health* 2013; **1**: e46-54.
- 802 132. Maze MJ, Biggs HM, Rubach MP, et al. Comparison of the Estimated Incidence of Acute Leptospirosis  
803 in the Kilimanjaro Region of Tanzania between 2007-08 and 2012-14. 2016; **10**: e0005165.
- 804 133. McGready R, Ashley EA, Wuthiekanun V, et al. Arthropod borne disease: the leading cause of fever in  
805 pregnancy on the Thai-Burmese border. *PLoS Negl Trop Dis* 2010; **4**: e888.
- 806 134. Mueller TC, Siv S, Khim N, et al. Acute undifferentiated febrile illness in rural Cambodia: a 3-year  
807 prospective observational study. *PLoS One* 2014; **9**: e95868.
- 808 135. Murdoch DR, Woods CW, Zimmerman MD, et al. The etiology of febrile illness in adults presenting to  
809 Patan hospital in Kathmandu, Nepal. *Am J Trop Med Hyg* 2004; **70**: 670-5.
- 810 136. Murray CK, Gray MR, Mende K, et al. Use of patient-specific *Leptospira* isolates in the diagnosis of  
811 leptospirosis employing microscopic agglutination testing (MAT). *Trans R Soc Trop Med Hyg* 2011; **105**: 209-  
812 13.

- 813 137. Natarajaseenivasan K, Prabhu N, Selvanayaki K, Raja SS, Ratnam S. Human leptospirosis in Erode,  
814 South India: serology, isolation, and characterization of the isolates by randomly amplified polymorphic DNA  
815 (RAPD) fingerprinting. *Jpn J Infect Dis* 2004; **57**: 193-7.
- 816 138. Natarajaseenivasan K, Raja V, Narayanan R. Rapid diagnosis of leptospirosis in patients with different  
817 clinical manifestations by 16S rRNA gene based nested PCR. *Saudi J Biol Sci* 2012; **19**: 151-5.
- 818 139. Phimda K, Hoontrakul S, Suttinont C, et al. Doxycycline versus azithromycin for treatment of  
819 leptospirosis and scrub typhus. *Antimicrob Agents Chemother* 2007; **51**: 3259-63.
- 820 140. Rafizah AA, Aziah BD, Azwany YN, et al. A hospital-based study on seroprevalence of leptospirosis  
821 among febrile cases in northeastern Malaysia. *Int J Infect Dis* 2013; **17**: e394-7.
- 822 141. Rao P, Sethi S, Sud A, Banga SS, Sharma M. Screening of patients with acute febrile illness for  
823 leptospirosis using clinical criteria and serology. *Natl Med J India* 2005; **18**: 244-6.
- 824 142. Ravindar A, Shanmugam P. Co-infection of Dengue and Leptospirosis in Patients Presenting to a  
825 Tertiary Care Hospital with Acute Febrile Illness: A Cross-sectional Study. *J Clin Diagn Res* 2018; **12**: DC05-  
826 DC9.
- 827 143. Reller ME, Wunder EA, Jr., Miles JJ, et al. Unsuspected leptospirosis is a cause of acute febrile illness  
828 in Nicaragua. *PLoS Negl Trop Dis* 2014; **8**: e2941.
- 829 144. Ribeiro P, Bhatt N, Ali S, et al. Seroprevalence of leptospirosis among febrile patients in a rapidly  
830 growing suburban slum and a flood-vulnerable rural district in Mozambique, 2012-2014: Implications for the  
831 management of fever. *Int J Infect Dis* 2017; **64**: 50-7.
- 832 145. Ricapa-Antay F, Diaz-Melon K, Silva-Caso W, et al. Molecular detection and clinical characteristics of  
833 *Bartonella bacilliformis*, *Leptospira* spp., and *Rickettsia* spp. in the Southeastern Peruvian Amazon basin. *BMC*  
834 *Infect Dis* 2018; **18**: 618.
- 835 146. Rubbo PA, Soupe-Gilbert ME, Golongba DM, et al. Evidence of human leptospirosis cases in a cohort  
836 of febrile patients in Bangui, Central African Republic: a retrospective study, 2012-2015. *BMC Infect Dis* 2018;  
837 **18**: 376.
- 838 147. Sengupta M, Prabhakar AK, Satyendra S, et al. Utility of Loop-mediated Isothermal Amplification  
839 Assay, Polymerase Chain Reaction, and ELISA for Diagnosis of Leptospirosis in South Indian Patients. *J Glob*  
840 *Infect Dis* 2017; **9**: 3-7.
- 841 148. Suttinont C, Losuwanaluk K, Niwatayakul K, et al. Causes of acute, undifferentiated, febrile illness in  
842 rural Thailand: results of a prospective observational study. *Ann Trop Med Parasit* 2006; **100**: 363-70.
- 843 149. Thipmontree W, Suputtamongkol Y, Tantibhedhyangkul W, Suttinont C, Wongswat E, Silpasakorn S.  
844 Human leptospirosis trends: northeast Thailand, 2001-2012. *Int J Environ Res Public Health* 2014; **11**: 8542-51.
- 845 150. Waggoner J, Brichard J, Mutuku F, et al. Malaria and Chikungunya Detected Using Molecular  
846 Diagnostics Among Febrile Kenyan Children. *Open Forum Infect Dis* 2017; **4**: ofx110.
- 847 151. Wuthiekanun V, Chierakul W, Limmathurotsakul D, et al. Optimization of culture of *Leptospira* from  
848 humans with leptospirosis. *J Clin Microbiol* 2007; **45**: 1363-5.
- 849 152. Zida S, Kania D, Sotto A, et al. Leptospirosis as Cause of Febrile Icteric Illness, Burkina Faso. *Emerg*  
850 *Infect Dis* 2018; **24**: 1569-72.
- 851 153. El-Mahallawy H, Sidhom I, El-Din NHA, Zamzam M, El-Lamie MM. Clinical and microbiologic  
852 determinants of serious bloodstream infections in Egyptian pediatric cancer patients: a one-year study. *Int J*  
853 *Infect Dis* 2005; **9**: 43-51.
- 854 154. Chadha MS, Comer JA, Lowe L, et al. Nipah virus-associated encephalitis outbreak, Siliguri, India.  
855 *Emerg Infect Dis* 2006; **12**: 235-40.
- 856 155. Blacksell SD, Sharma NP, Phumratanaprapin W, et al. Serological and blood culture investigations of  
857 Nepalese fever patients. *Trans R Soc Trop Med Hyg* 2007; **101**: 686-90.
- 858 156. Blacksell SD, Jenjaroen K, Phetsouvanh R, et al. Accuracy of rapid IgM-based  
859 immunochromatographic and immunoblot assays for diagnosis of acute scrub typhus and murine typhus  
860 infections in Laos. *Am J Trop Med Hyg* 2010; **83**: 365-9.
- 861 157. Blacksell SD, Tanganuchitcharnchai A, Nawtaisong P, et al. Diagnostic Accuracy of the InBios Scrub  
862 Typhus Detect Enzyme-Linked Immunoassay for the Detection of IgM Antibodies in Northern Thailand. *Clin*  
863 *Vaccine Immunol* 2016; **23**: 148-54.
- 864 158. Blacksell SD, Lim C, Tanganuchitcharnchai A, et al. Optimal Cutoff and Accuracy of an IgM Enzyme-  
865 Linked Immunosorbent Assay for Diagnosis of Acute Scrub Typhus in Northern Thailand: an Alternative  
866 Reference Method to the IgM Immunofluorescence Assay. *J Clin Microbiol* 2016; **54**: 1472-8.
- 867 159. Jung HC, Chon SB, Oh WS, Lee DH, Lee HJ. Etiologies of acute undifferentiated fever and clinical  
868 prediction of scrub typhus in a non-tropical endemic area. *Am J Trop Med Hyg* 2015; **92**: 256-61.
- 869 160. Kingston HW, Hossain M, Leopold S, et al. Rickettsial Illnesses as Important Causes of Febrile Illness  
870 in Chittagong, Bangladesh. *Emerg Infect Dis* 2018; **24**.
- 871 161. Kocher C, Jiang J, Morrison AC, et al. Serologic Evidence of Scrub Typhus in the Peruvian Amazon.  
872 *Emerg Infect Dis* 2017; **23**: 1389-91.

- 873 162. Kumar V, Kumar V, Yadav AK, et al. Scrub Typhus Is an Under-recognized Cause of Acute Febrile  
874 Illness with Acute Kidney Injury in India. *PLoS Negl Trop Dis* 2014; **8**.
- 875 163. Maude RR, de Jong HK, Wijedoru L, et al. The diagnostic accuracy of three rapid diagnostic tests for  
876 typhoid fever at Chittagong Medical College Hospital, Chittagong, Bangladesh. *Trop Med Int Health* 2015; **20**:  
877 1376-84.
- 878 164. Paris DH, Blacksell SD, Nawtaisong P, et al. Diagnostic Accuracy of a Loop-Mediated Isothermal PCR  
879 Assay for Detection of *Orientia tsutsugamushi* during Acute Scrub Typhus Infection. *PLoS Negl Trop Dis* 2011;  
880 **5**.
- 881 165. Reller ME, Bodinayake C, Nagahawatte A, et al. Unsuspected rickettsioses among patients with acute  
882 febrile illness, Sri Lanka, 2007. *Emerg Infect Dis* 2012; **18**: 825-9.
- 883 166. Saisongkorh W, Chenchittikul M, Silpapojakul K. Evaluation of nested PCR for the diagnosis of scrub  
884 typhus among patients with acute pyrexia of unknown origin. *Trans R Soc Trop Med Hyg* 2004; **98**: 360-6.
- 885 167. Sonthayanon P, Chierakul W, Wuthiekanun V, et al. Rapid diagnosis of scrub typhus in rural Thailand  
886 using polymerase chain reaction. *Am J Trop Med Hyg* 2006; **75**: 1099-102.
- 887 168. Srinivasan S, Menon T. Molecular detection of *Orientia tsutsugamushi* from suspected scrub typhus  
888 cases. *Indian J Pathol Microbiol* 2017; **60**: 70-3.
- 889 169. Thipmontree W, Tantibhedhyangkul W, Silpasakorn S, Wongsawat E, Waywa D, Suputtamongkol Y.  
890 Scrub Typhus in Northeastern Thailand: Eschar Distribution, Abnormal Electrocardiographic Findings, and  
891 Predictors of Fatal Outcome. *Am J Trop Med Hyg* 2016; **95**: 769-73.
- 892 170. Tshokey T, Stenos J, Durrheim DN, et al. Rickettsial Infections and Q Fever Amongst Febrile Patients  
893 in Bhutan. *Trop Med Infect Dis* 2018; **3**.
- 894 171. Bengre ML, Prabhu MV, Arun S, Prasad K, Baht KG. Evaluation of the Multinational Association for  
895 Supportive Care in Cancer (MASCC) Score for Identifying Low Risk Febrile Neutropaenic Patients at a South  
896 Indian Tertiary Care Centre. *J Clin Diagn Res* 2012; **6**: 839-43.
- 897 172. Bouchaib H, Eldin C, Laroche M, Raoult D, Parola P. Tick- and flea-borne rickettsioses in Tizi-Ouzou,  
898 Algeria: Implications for travel medicine. *Travel Med Infect Dis* 2018; **26**: 51-7.
- 899 173. Chowdhury NF, Paul SK, Aung MS, et al. Nationwide prevalence of *Rickettsia felis* infections in  
900 patients with febrile illness in Bangladesh. *New Microbes New Infect* 2017; **19**: 123-5.
- 901 174. dos Santos FC, do Nascimento EM, Katz G, et al. Brazilian spotted fever: real-time PCR for diagnosis  
902 of fatal cases. *Ticks Tick Borne Dis* 2012; **3**: 312-4.
- 903 175. Eremeeva ME, Berganza E, Suarez G, et al. Investigation of an outbreak of rickettsial febrile illness in  
904 Guatemala, 2007. *Int J Infect Dis* 2013; **17**: e304-11.
- 905 176. Gaowa, Wulantuya, Yin X, et al. Spotted Fever Group Rickettsiae in Inner Mongolia, China, 2015–  
906 2016. *Emerg Infect Dis* 2018; **24**: 2105-7.
- 907 177. Hidalgo M, Montoya V, Martinez A, et al. Flea-borne rickettsioses in the north of Caldas province,  
908 Colombia. *Vector Borne Zoonotic Dis* 2013; **13**: 289-94.
- 909 178. Kuloglu F, Rolain JM, Akata F, Eroglu C, Celik AD, Parola P. Mediterranean spotted fever in the  
910 Trakya region of Turkey. *Ticks Tick Borne Dis* 2012; **3**: 298-304.
- 911 179. Liu W, Li H, Lu QB, et al. Candidatus *Rickettsia tarasevichiae* Infection in Eastern Central China: A  
912 Case Series. *Ann Intern Med* 2016; **164**: 641-8.
- 913 180. Maina AN, Knobel DL, Jiang J, et al. *Rickettsia felis* infection in febrile patients, western Kenya, 2007-  
914 2010. *Emerg Infect Dis* 2012; **18**: 328-31.
- 915 181. Mediannikov O, Diatta G, Fenollar F, Sokhna C, Trape JF, Raoult D. Tick-borne rickettsioses,  
916 neglected emerging diseases in rural Senegal. *PLoS Negl Trop Dis* 2010; **4**.
- 917 182. Mediannikov O, Socolovschi C, Edouard S, et al. Common epidemiology of *Rickettsia felis* infection  
918 and malaria, Africa. *Emerg Infect Dis* 2013; **19**: 1775-83.
- 919 183. Mongkol N, Suputtamongkol Y, Taweethavonsawat P, Foongladda S. Molecular Evidence of *Rickettsia*  
920 in Human and Dog Blood in Bangkok. *Vector Borne Zoonotic Dis* 2018; **18**: 297-302.
- 921 184. Mourembou G, Fenollar F, Socolovschi C, et al. Molecular Detection of Fastidious and Common  
922 Bacteria as well as *Plasmodium* spp. in Febrile and Afebrile Children in Franceville, Gabon. *Am J Trop Med*  
923 *Hyg* 2015; **92**: 926-32.
- 924 185. Mourembou G, Lekana-Douki JB, Mediannikov O, et al. Possible Role of *Rickettsia felis* in Acute  
925 Febrile Illness among Children in Gabon. *Emerg Infect Dis* 2015; **21**: 1808-15.
- 926 186. Ndip LM, Fokam EB, Bouyer DH, et al. Detection of *Rickettsia africae* in patients and ticks along the  
927 coastal region of Cameroon. *Am J Trop Med Hyg* 2004; **71**: 363-6.
- 928 187. Prakash JA, Sohan Lal T, Rosemol V, et al. Molecular detection and analysis of spotted fever group  
929 *Rickettsia* in patients with fever and rash at a tertiary care centre in Tamil Nadu, India. *Pathog Glob Hlth* 2012;  
930 **106**: 40-5.
- 931 188. Richards AL, Jiang J, Omulo S, et al. Human Infection with *Rickettsia felis*, Kenya. *Emerg Infect Dis*  
932 2010; **16**: 1081-6.

- 933 189. Sothmann P, Keller C, Krumkamp R, et al. *Rickettsia felis* Infection in Febrile Children, Ghana. *Am J Trop Med Hyg* 2017; **96**: 783-5.
- 934
- 935 190. Hidalgo M, Salguero E, de la Ossa A, et al. Short report: Murine typhus in Caldas, Colombia. *Am J Trop Med Hyg* 2008; **78**: 321-2.
- 936
- 937 191. Pradhan R, Shrestha U, Gautam SC, et al. Bloodstream infection among children presenting to a general hospital outpatient clinic in urban Nepal. *PLoS One* 2012; **7**: e47531.
- 938
- 939 192. Zimmerman MD, Murdoch DR, Rozmajzl PJ, et al. Murine typhus and febrile illness, Nepal. *Emerg Infect Dis* 2008; **14**: 1656-9.
- 940
- 941 193. Baudin M, Jumaa AM, Jomma HJE, et al. Association of Rift Valley fever virus infection with miscarriage in Sudanese women: a cross-sectional study. *Lancet Glob Health* 2016; **4**: e864-e71.
- 942
- 943 194. Sow A, Loucoubar C, Diallo D, et al. Concurrent malaria and arbovirus infections in Kedougou, southeastern Senegal. *Malar J* 2016; **15**: 47.
- 944
- 945 195. Akinyemi KO, Bamiro BS, Coker AO. Salmonellosis in Lagos, Nigeria: incidence of *Plasmodium falciparum*-associated co-infection, patterns of antimicrobial resistance, and emergence of reduced susceptibility to fluoroquinolones. *J Hlth Popul Nutr* 2007; **25**: 351-8.
- 946
- 947 196. Akinyemi KO, Iwalokun BA, Alafe OO, Mudashiru SA, Fakorede C. bla CTX-M-I group extended spectrum beta lactamase-producing *Salmonella typhi* from hospitalized patients in Lagos, Nigeria. *Infect Drug Resist* 2015; **8**: 99-106.
- 948
- 949 197. Al-Emran HM, Eibach D, Krumkamp R, et al. A Multicountry Molecular Analysis of *Salmonella enterica* Serovar Typhi With Reduced Susceptibility to Ciprofloxacin in Sub-Saharan Africa. *Clin Infect Dis* 2016; **62 Suppl 1**: S42-6.
- 950
- 951 198. Al-Emran HM, Krumkamp R, Dekker DM, et al. Validation and Identification of Invasive *Salmonella* Serotypes in Sub-Saharan Africa by Multiplex Polymerase Chain Reaction. *Clin Infect Dis* 2016; **62 Suppl 1**: S80-2.
- 952
- 953
- 954 199. Andualem G, Abebe T, Kebede N, Gebre-Selassie S, Mihret A, Alemayehu H. A comparative study of Widal test with blood culture in the diagnosis of typhoid fever in febrile patients. *BMC Res Notes* 2014; **7**: 653.
- 955
- 956 200. Bello N, Kudu ATD, Adetokun AB, et al. Characterization and Antimicrobial Susceptibility Profile of Bacteraemia Causing Pathogens Isolated from Febrile Children with and without Sickle Cell Disease in Kano, Nigeria. *Mediterr J Hematol Infect Dis* 2018; **10**: e2018016.
- 957
- 958 201. Biggs HM, Lester R, Nadjm B, et al. Invasive *Salmonella* infections in areas of high and low malaria transmission intensity in Tanzania. *Clin Infect Dis* 2014; **58**: 638-47.
- 959
- 960 202. Bilman FB, Cicek B, Gulesen R, Levent B. Epidemiological Analysis Using Pulsed-Field Gel Electrophoresis of *Salmonella enteritidis* Outbreak in Factory Workers. *Jundishapur J Microbiol* 2017; **10**: e14144.
- 961
- 962 203. Brooks WA, Hossain A, Goswami D, et al. Bacteremic typhoid fever in children in an urban slum, Bangladesh. *Emerg Infect Dis* 2005; **11**: 326-9.
- 963
- 964 204. Brown B, Dada-Adegbola H, Trippe C, Olopade O. Prevalence and Etiology of Bacteremia in Febrile Children with Sickle Cell Disease at a Nigeria Tertiary Hospital. *Mediterr J Hematol Infect Dis* 2017; **9**: e2017039.
- 965
- 966 205. Crump JA, Ramadhani HO, Morrissey AB, et al. Invasive bacterial and fungal infections among hospitalized HIV-infected and HIV-uninfected adults and adolescents in northern Tanzania. *Clin Infect Dis* 2011; **52**: 341-8.
- 967
- 968 206. Crump JA, Ramadhani HO, Morrissey AB, et al. Invasive bacterial and fungal infections among hospitalized HIV-infected and HIV-uninfected children and infants in northern Tanzania. *Trop Med Int Health* 2011; **16**: 830-7.
- 969
- 970 207. D'Acremont V, Kilowoko M, Kyungu E, et al. Beyond malaria--causes of fever in outpatient Tanzanian children. *N Engl J Med* 2014; **370**: 809-17.
- 971
- 972 208. Davies DH, Jain A, Nakajima R, et al. Serodiagnosis of Acute Typhoid Fever in Nigerian Pediatric Cases by Detection of Serum IgA and IgG against Hemolysin E and Lipopolysaccharide. *Am J Trop Med Hyg* 2016; **95**: 431-9.
- 973
- 974 209. Dong B, Liang D, Lin M, et al. Bacterial etiologies of five core syndromes: laboratory-based syndromic surveillance conducted in Guangxi, China. *PLoS One* 2014; **9**: e110876.
- 975
- 976 210. Eibach D, Belmar Campos C, Krumkamp R, et al. Extended spectrum beta-lactamase producing Enterobacteriaceae causing bloodstream infections in rural Ghana, 2007-2012. *Int J Med Microbiol* 2016; **306**: 249-54.
- 977
- 978 211. Gordon MA, Kankwatira AM, Mwafulirwa G, et al. Invasive non-typhoid salmonellae establish systemic intracellular infection in HIV-infected adults: an emerging disease pathogenesis. *Clin Infect Dis* 2010; **50**: 953-62.
- 979
- 980
- 981
- 982
- 983
- 984
- 985
- 986
- 987
- 988
- 989
- 990



- 991 212. Saha S, Islam M, Uddin MJ, et al. Integration of enteric fever surveillance into the WHO-coordinated  
992 Invasive Bacterial-Vaccine Preventable Diseases (IB-VPD) platform: A low cost approach to track an  
993 increasingly important disease. *PLoS Negl Trop Dis* 2017; **11**: e0005999.
- 994 213. Jeon HJ, Pak GD, Im J, et al. Determining the Best Immunization Strategy for Protecting African  
995 Children Against Invasive Salmonella Disease. *Clin Infect Dis* 2018; **67**: 1824-30.
- 996 214. Kibuuka A, Byakika-Kibwika P, Achan J, et al. Bacteremia Among Febrile Ugandan Children Treated  
997 with Antimalarials Despite a Negative Malaria Test. *Am J Trop Med Hyg* 2015; **93**: 276-80.
- 998 215. Kiemde F, Tahita MC, Lompo P, et al. Treatable causes of fever among children under five years in a  
999 seasonal malaria transmission area in Burkina Faso. *Infect Dis Poverty* 2018; **7**: 60.
- 1000 216. Ley B, Mtove G, Thriemer K, et al. Evaluation of the Widal tube agglutination test for the diagnosis of  
1001 typhoid fever among children admitted to a rural hospital in Tanzania and a comparison with previous studies.  
1002 *BMC Infect Dis* 2010; **10**: 180.
- 1003 217. Mahende C, Ngasala B, Lusingu J, et al. Aetiology of Acute Febrile Episodes in Children Attending  
1004 Korogwe District Hospital in North-Eastern Tanzania. *Plos One* 2014; **9**.
- 1005 218. Marks F, von Kalkreuth V, Aaby P, et al. Incidence of invasive salmonella disease in sub-Saharan  
1006 Africa: a multicentre population-based surveillance study. *Lancet Glob Health* 2017; **5**: e310-e23.
- 1007 219. Meremo A, Mshana SE, Kidenya BR, Kabangila R, Peck R, Kataraihya JB. High prevalence of Non-  
1008 typhoid salmonella bacteraemia among febrile HIV adult patients admitted at a tertiary Hospital, North-Western  
1009 Tanzania. *Int Arch Med* 2012; **5**: 28.
- 1010 220. Moon TD, Silva WP, Buene M, et al. Bacteremia as a cause of fever in ambulatory, HIV-infected  
1011 Mozambican adults: results and policy implications from a prospective observational study. *PLoS One* 2013; **8**:  
1012 e83591.
- 1013 221. Mourembou G, Nzondo SM, Ndjoyi-Mbiguino A, et al. Co-circulation of Plasmodium and Bacterial  
1014 DNAs in Blood of Febrile and Afebrile Children from Urban and Rural Areas in Gabon. *Am J Trop Med Hyg*  
1015 2016; **95**: 123-32.
- 1016 222. Mtove G, Amos B, von Seidlein L, et al. Invasive salmonellosis among children admitted to a rural  
1017 Tanzanian hospital and a comparison with previous studies. *PLoS One* 2010; **5**: e9244.
- 1018 223. Mtove G, Amos B, Nadjm B, et al. Decreasing incidence of severe malaria and community-acquired  
1019 bacteraemia among hospitalized children in Muheza, north-eastern Tanzania, 2006-2010. *Malaria J* 2011; **10**.
- 1020 224. Mtove G, Hendriksen IC, Amos B, et al. Treatment guided by rapid diagnostic tests for malaria in  
1021 Tanzanian children: safety and alternative bacterial diagnoses. *Malar J* 2011; **10**: 290.
- 1022 225. Nadjm B, Amos B, Mtove G, et al. WHO guidelines for antimicrobial treatment in children admitted to  
1023 hospital in an area of intense *Plasmodium falciparum* transmission: prospective study. *BMJ* 2010; **340**: c1350.
- 1024 226. Nadjm B, Mtove G, Amos B, et al. Severe febrile illness in adult hospital admissions in Tanzania: a  
1025 prospective study in an area of high malaria transmission. *Trans R Soc Trop Med Hyg* 2012; **106**: 688-95.
- 1026 227. Ochaya O, Hume H, Bugeza S, et al. ACS in children with sickle cell anaemia in Uganda: prevalence,  
1027 presentation and aetiology. *Br J Haematol* 2018; **183**: 289-97.
- 1028 228. Onchiri FM, Pavlinac PB, Singa BO, et al. Low Bacteremia Prevalence Among Febrile Children in  
1029 Areas of Differing Malaria Transmission in Rural Kenya: A Cross-Sectional Study. *J Pediatric Infect Dis Soc*  
1030 2016; **5**: 385-94.
- 1031 229. Onyango D, Machioni F, Kakai R, Waindi EN. Multidrug resistance of *Salmonella enterica* serovars  
1032 Typhi and Typhimurium isolated from clinical samples at two rural hospitals in Western Kenya. *J Infect Dev*  
1033 *Ctries* 2008; **2**: 106-11.
- 1034 230. Onyango MD, Ghebremedhin B, Waindi EN, et al. Phenotypic and genotypic analysis of clinical  
1035 isolates *Salmonella* serovar Typhimurium in western Kenya. *J Infect Dev Ctries* 2009; **3**: 685-94.
- 1036 231. Park SE, Pak GD, Aaby P, et al. The Relationship Between Invasive Nontyphoidal *Salmonella* Disease,  
1037 Other Bacterial Bloodstream Infections, and Malaria in Sub-Saharan Africa. *Clin Infect Dis* 2016; **62 Suppl 1**:  
1038 S23-31.
- 1039 232. Peters RPH, Zijlstra EE, Schijffelen MJ, et al. A prospective study of bloodstream infections as cause of  
1040 fever in Malawi: clinical predictors and implications for management. *Trop Med Int Health* 2004; **9**: 928-34.
- 1041 233. Preziosi M, Zimba TF, Lee K, et al. A prospective observational study of bacteraemia in adults admitted  
1042 to an urban Mozambican hospital. *S Afr Med J* 2015; **105**: 370-4.
- 1043 234. Sothmann P, Krumkamp R, Kreuels B, et al. Urbanicity and Paediatric Bacteraemia in Ghana-A Case-  
1044 Control Study within a Rural-Urban Transition Zone. *PLoS One* 2015; **10**: e0139433.
- 1045 235. Tezcan G, Kupesz A, Ozturk F, et al. Episodes of fever and neutropenia in children with cancer in a  
1046 tertiary care medical center in Turkey. *Pediatr Hematol Oncol* 2006; **23**: 217-29.
- 1047 236. Wiersinga WJ, Birnie E, Weehuizen TA, et al. Clinical, environmental, and serologic surveillance  
1048 studies of melioidosis in Gabon, 2012-2013. *Emerg Infect Dis* 2015; **21**: 40-7.
- 1049 237. Degarege A, Legesse M, Medhin G, Animut A, Erko B. Malaria and related outcomes in patients with  
1050 intestinal helminths: a cross-sectional study. *BMC Infect Dis* 2012; **12**: 291.

- 1051 238. Hinjoy S, Wacharapluesadee S, Iamsirithawron S, Smithsuwan P, Padungtod P. Zoonotic and vector  
1052 borne agents causing disease in adult patients hospitalized due to fever of unknown origin in Thailand. *Asian*  
1053 *Pac J Trop Dis* 2017; **7**: 577-81.
- 1054 239. Adurthi S, Sahoo T, Chakka K, et al. Acute toxoplasmosis in nonstem cell transplant patients with  
1055 haematological malignancies: a study from a regional cancer institute in South India. *Hematological Oncology*  
1056 2008; **26**: 229-33.
- 1057 240. Forshey BM, Guevara C, Laguna-Torres VA, et al. Arboviral etiologies of acute febrile illnesses in  
1058 Western South America, 2000-2007. *PLoS Negl Trop Dis* 2010; **4**: e787.
- 1059 241. Kocher C, Morrison AC, Leguia M, et al. Rickettsial Disease in the Peruvian Amazon Basin. *PLoS Negl*  
1060 *Trop Dis* 2016; **10**.
- 1061 242. Morrison AC, Forshey BM, Notyce D, et al. Venezuelan equine encephalitis virus in Iquitos, Peru:  
1062 urban transmission of a sylvatic strain. *PLoS Negl Trop Dis* 2008; **2**: e349.
- 1063 243. Chinikar S, Javadi A, Ataei B, et al. Detection of West Nile virus genome and specific antibodies in  
1064 Iranian encephalitis patients. *Epidemiol Infect* 2012; **140**: 1525-9.
- 1065 244. Elyan DS, Moustafa L, Noormal B, et al. Serological evidence of Flaviviruses infection among acute  
1066 febrile illness patients in Afghanistan. *J Infect Dev Countr* 2014; **8**: 1176-80.
- 1067 245. Kumar JS, Saxena D, Parida M. Development and comparative evaluation of SYBR Green I-based one-  
1068 step real-time RT-PCR assay for detection and quantification of West Nile virus in human patients. *Mol Cell*  
1069 *Probes* 2014; **28**: 221-7.
- 1070 246. Rutvisuttinunt W, Chinnawirotpisan P, Klungthong C, et al. Evidence of West Nile virus infection in  
1071 Nepal. *BMC Infect Dis* 2014; **14**: 606.
- 1072 247. Tigoi C, Lwande O, Orindi B, Irura Z, Ongus J, Sang R. Seroepidemiology of Selected Arboviruses in  
1073 Febrile Patients Visiting Selected Health Facilities in the Lake/River Basin Areas of Lake Baringo, Lake  
1074 Naivasha, and Tana River, Kenya. *Vector Borne Zoonotic Dis* 2015; **15**: 124-32.
- 1075 248. Williams SH, Cordey S, Bhuvana N, et al. Investigation of the Plasma Virome from Cases of Unexplained  
1076 Febrile Illness in Tanzania from 2013 to 2014: a Comparative Analysis between Unbiased and VirCapSeq-  
1077 VERT High-Throughput Sequencing Approaches. *mSphere* 2018; **3**.
- 1078 249. Sinyange N, Kumar R, Inambao A, et al. Outbreak of Plague in a High Malaria Endemic Region -  
1079 Nyimba District, Zambia, March-May 2015. *Mmwr-Morbidity Mortal W* 2016; **65**: 807-11.
- 1080
- 1081
